# Supplementary material
Source: HighWire-hosted journal article supplement (https://thorax.bmj.com/highwire/filestream/174531/field_highwire_adjunct_files/1/Thorax_Appendix_2_133280.xlsx)
Supplement: Thorax_Appendix_2_133280.xlsx [file Thorax_Appendix_2_133280.xlsx]

## Sheet: Sheet1
1: Conley ME, Howard VC. X-Linked Agammaglobulinemia. 2001 Apr 5 [updated 2009
Jul 30]. In: Pagon RA, Bird TC, Dolan CR, Stephens K, editors. GeneReviews
[Internet]. Seattle (WA): University of Washington, Seattle; 1993-. Available
from http://www.ncbi.nlm.nih.gov/bookshelf/br.fcgi?book=gene&part=xla
PubMed PMID: 20301626.
2: Prior TW, Russman BS. Spinal Muscular Atrophy. 2000 Feb 24 [updated 2006 Apr
3]. In: Pagon RA, Bird TC, Dolan CR, Stephens K, editors. GeneReviews [Internet].
Seattle (WA): University of Washington, Seattle; 1993-. Available from
http://www.ncbi.nlm.nih.gov/bookshelf/br.fcgi?book=gene&part=sma
PubMed PMID: 20301526.
3: Yepes D, Molina F, Ortiz G, Aguirre R. [Risk factors associated with the
presence of pneumonia in patients with brain injury]. Biomedica. 2009
Jun;29(2):253-9. Spanish. PubMed PMID: 20128350.
4: Zucchetto A, Bruzzone S, De Paoli A, Regine V, Pappagallo M, Dal Maso L,
Serraino D, Rezza G, Suligoi B. [AIDS and injecting drug use: survival
determinants in the highly active antiretroviral therapy era.]. Epidemiol Prev.
2009 Jul-Oct;33(4-5):184-9. Italian. PubMed PMID: 20124634.
5: Ou Q, Lu Y, Huang Q, Cheng X. Clinical analysis of 150 cases with the novel
influenza A (H1N1) virus infection in Shanghai, China. Biosci Trends. 2009
Aug;3(4):127-30. PubMed PMID: 20103836.
6: Kyzyl-Oll MM, Pospelov AL, Kordicheva SIu, Soroko-Novitskaia AN, Pospelov LE,
Mishin VIu. [The specific features of the course of pulmonary tuberculosis in
young Tuvinians in relation to some antigens of the HLA complex]. Probl Tuberk
Bolezn Legk. 2009;(12):53-7. Russian. PubMed PMID: 20095374.
7: Doruk S, Bulaç S, Sevinç C, Bodur HA, Yilmaz A, Erkorkmaz U, Ocal S. [Severity
scores and factors related with mortality in cases with community-acquired
pneumonia patients in intensive care unit]. Tuberk Toraks. 2009;57(4):393-400.
Turkish. PubMed PMID: 20037854.
8: Sohn GH, Shin DH, Byun KM, Han HJ, Cho SJ, Song YB, Kim JH, On YK, Kim JS. The
incidence and predictors of postoperative atrial fibrillation after
noncardiothoracic surgery. Korean Circ J. 2009 Mar;39(3):100-4. Epub 2009 Mar 25.
PubMed PMID: 19949595; PubMed Central PMCID: PMC2771806.
9: Podol'skiĭ PN, Datsenko PV, Pan'shin GA, Sotnikov VM, Mel'nik IuD, Ivashin AV,
Bozhenko VK. [Multivariate analysis of risk of cardiac complications in Hodgkin's
lymphoma]. Vopr Onkol. 2009;55(4):447-50. Russian. PubMed PMID: 19947368.
10: Borreman P, De Leyn P, Decaluwé H, Moons J, Van Raemdonck D, Nafteux P,
Coosemans W, Lerut T. Morbidity and mortality after induction chemotherapy
followed by surgery in IIIa-N2 non small cell lung cancer. Acta Chir Belg. 2009
May-Jun;109(3):333-9. PubMed PMID: 19943589.
11: Wei BQ, Yang YJ, Zhang J, Dou KF, Zhang YH, Huang XH, Kang LM, Zhang CL, Gu
Q, Gao X, Yang YM, Dai Y, Yu LT, Zhang HM, Lü R. [Predictive value of admission
amino-terminal pro-B-type natriuretic peptide on in-hospital mortality in
patients with decompensated heart failure]. Zhonghua Xin Xue Guan Bing Za Zhi.
2009 Jun;37(6):481-5. Chinese. PubMed PMID: 19927625.
12: Turner EJ, Tsim H, Pawade J, Wolowczyk L. A case of primary cutaneous B-cell
lymphoma of the knee. Dermatol Online J. 2009 Jul 15;15(7):6. PubMed PMID:
19903434
13: Hristea A, Nicolae D, Luka AI, Constantinescu RM, Aramă V, Tănăsescu R.
Invasive pneumococcal infections: Austrian syndrome. Rom J Intern Med.
2009;47(1):93-6. PubMed PMID: 19886075.
14: Renaud B, Santin A. Severe community acquired pneumonia: what should we
predict? Crit Care. 2009;13(5):421. Epub 2009 Oct 15. PubMed PMID: 19849826;
PubMed Central PMCID: PMC2784381.
15: Casella F, Finazzi L, Repetti V, Rubin G, Dimarco M, Mauro T, Furlan R. Liver
abscess caused by Klebsiella pneumoniae: two case reports. Cases J. 2009 May
15;2:6879. PubMed PMID: 19829875; PubMed Central PMCID: PMC2740293.
16: Klerkx S, Pat K, Wuyts W. Minocycline induced eosinophilic pneumonia: case
report and review of literature. Acta Clin Belg. 2009 Jul-Aug;64(4):349-54.
PubMed PMID: 19810425.
17: Cvetkovic Z, Cvetkovic B, Petrovic M, Ranic M, Debeljak-Martarcic J, Vucic V,
Glibetic M. Lipid profile as a prognostic factor in cancer patients. J BUON. 2009
Jul-Sep;14(3):501-6. PubMed PMID: 19810145.
18: Eryüksel E, Karakurt S, Balci M, Celikel T. Non-invasive positive pressure
ventilation for a severe legionella pneumonia case. Tuberk Toraks.
2009;57(3):348-51. PubMed PMID: 19787476.
19: Barlo NP, van Moorsel CH, van den Bosch JM, van de Graaf EA, Kwakkel-van Erp
JM, Grutters JC. [Idiopathic pulmonary fibrosis; description of a Dutch cohort].
Ned Tijdschr Geneeskd. 2009;153:B425. Dutch. PubMed PMID: 19785823.
20: Daković Z, Vesić S, Tomović M, Vuković J. Oropharyngeal dysphagia as dominant
and life-threatening symptom in dermatomyositis. Vojnosanit Pregl. 2009
Aug;66(8):671-4. PubMed PMID: 19780425.
21: de Wit NC, de Jager CP, Meekelenkamp JC, Schoorl M, van Gageldonk-Lafeber AB,
Leenders AC, Kusters R, Wever PC. Markers of infection in inpatients and
outpatients with acute Q-fever. Clin Chem Lab Med. 2009;47(11):1407-9. PubMed
PMID: 19778289.
22: Pearl A, Bar-Or D. Using artificial neural networks to predict potential
complications during trauma patients' hospitalization period. Stud Health Technol
Inform. 2009;150:610-4. PubMed PMID: 19745384.
23: Wei Q, Yu LX, Deng WF, Ye JS. [Multivariate analysis of the risk factors of
cytomegalovirus pneumonia after renal transplantation]. Nan Fang Yi Ke Da Xue Xue
Bao. 2009 Jun;29(6):1182-4. Chinese. PubMed PMID: 19726356.
24: Minowa K, Nakiri Y, Lee S, Amano H, Morimoto S, Tamura N, Tokano Y, Takasaki
Y. [Examination of availability of the criteria for protective therapy against
Pneumocystis pneumonia]. Nihon Rinsho Meneki Gakkai Kaishi. 2009
Aug;32(4):256-62. Japanese. PubMed PMID: 19721346.
25: Lindemans CA, Bruinsma RA, Nikkels PG, Bröker FH, Arets HG. Pulmonary
consolidation and inflammation: inflammatory pseudotumour in young children.
Monaldi Arch Chest Dis. 2009 Jun;71(2):71-5. PubMed PMID: 19719039.
26: Sakaguchi Y, Niihata K, Yasuda K, Shimomura A, Uehata T, Inoue K, Kaneko T,
Shoji T, Tsubakihara Y, Okada N. [Autopsy case of PR3-ANCA-associated vasculitis
complicated with rectus muscle hematoma]. Nippon Jinzo Gakkai Shi.
2009;51(5):550-6. Japanese. PubMed PMID: 19715163.
27: Yan TD, Boyer M, Tin MM, Wong D, Kennedy C, McLean J, Bannon PG, McCaughan
BC. Extrapleural pneumonectomy for malignant pleural mesothelioma: outcomes of
treatment and prognostic factors. J Thorac Cardiovasc Surg. 2009
Sep;138(3):619-24. Epub 2009 Mar 9. PubMed PMID: 19698846.
28: Yamazaki-Nakashimada MA, Duran-McKinster C, Ramírez-Vargas N,
Hernandez-Bautista V. Intravenous immunoglobulin therapy for hypocomplementemic
urticarial vasculitis associated with systemic lupus erythematosus in a child.
Pediatr Dermatol. 2009 Jul-Aug;26(4):445-7. PubMed PMID: 19689522.
29: Campos GM, Borges AA, Badra SJ, Figueiredo GG, Souza RL, Moreli ML,
Figueiredo LT. [Pulmonary and cardiovascular syndrome due to hantavirus: clinical
aspects of an emerging disease in southeastern Brazil]. Rev Soc Bras Med Trop.
2009 May-Jun;42(3):282-9. Portuguese. PubMed PMID: 19684976.
30: Baĭgozina EA. [Analysis of clinical features and outcome of nosocomial
pneumonia caused by Pseudomonas aeruginosa]. Klin Med (Mosk). 2009;87(6):57-9.
Russian. PubMed PMID: 19670720.
31: Addington WR, Widdicombe J. Cough and aspiration. Chest. 2009
Aug;136(2):647-8; author reply 648. PubMed PMID: 19666771.
32: Katzenstein AL, Mukhopadhyay S, Myers JL. Erratum to "Diagnosis of usual
interstitial pneumonia and distinction from other fibrosing interstitial lung
diseases" [Hum Pathol 39 (2008) 1275-1294]. Hum Pathol. 2008 Nov;39(11):1562-81.
Review. PubMed PMID: 19653362.
33: Vasu TS, Cavallazzi R, Hirani A, Sharma D, Weibel SB, Kane GC. Clinical and
radiologic distinctions between secondary bronchiolitis obliterans organizing
pneumonia and cryptogenic organizing pneumonia. Respir Care. 2009
Aug;54(8):1028-32. PubMed PMID: 19650943.
34: Theilen U, Johnston ED, Robinson PA. [Rapidly fatal invasive pertussis
infection in infants--how can we favorably modify the disease outcome?]. Praxis
(Bern 1994). 2009 Jul 29;98(15):837-41. German. PubMed PMID: 19642068.
35: Avnon LS, Smolikov A, Almog Y. Varicella pneumonia in southern Israel:
clinical characteristics, diagnosis and therapeutic considerations. Isr Med Assoc
J. 2009 May;11(5):261-5. PubMed PMID: 19637501.
36: Puisieux F, D'andrea C, Baconnier P, Bui-Dinh D, Castaings-Pelet S, Crestani
B, Desrues B, Ferron C, Franco A, Gaillat J, Guenard H, Housset B, Jeandel C,
Jebrak G, Leymarie-Selles A, Orvoen-Frija E, Piette F, Pinganaud G, Salle JY,
Strubel D, Vernejoux JM, De Wazières B, Weil-Engerer S. [Swallowing disorders,
pneumonia and respiratory tract infectious disease in the elderly.]. Rev Mal
Respir. 2009 Jun;26(6):587-605. French. PubMed PMID: 19623104.
37: Deeter M, Dorer R, Kuppusamy MK, Koehler RP, Low DE. Assessment of criteria
and clinical significance of circumferential resection margins in esophageal
cancer. Arch Surg. 2009 Jul;144(7):618-24. PubMed PMID: 19620541.
38: Sanz F, Restrepo MI, Fernández E, Briones ML, Blanquer R, Mortensen EM,
Chiner E, Blanquer J; NAC-CV Study Group. Is it possible to predict which
patients with mild pneumonias will develop hypoxemia? Respir Med. 2009
Dec;103(12):1871-7. Epub 2009 Jul 19. PubMed PMID: 19619999.
39: Warnecke T, Ritter MA, Kroger B, Oelenberg S, Teismann I, Heuschmann PU,
Ringelstein EB, Nabavi DG, Dziewas R. Fiberoptic endoscopic Dysphagia severity
scale predicts outcome after acute stroke. Cerebrovasc Dis. 2009;28(3):283-9.
Epub 2009 Jul 16. PubMed PMID: 19609080.
40: Leppäranta O, Pulkkinen V, Koli K, Vähätalo R, Salmenkivi K, Kinnula VL,
Heikinheimo M, Myllärniemi M. Transcription factor GATA-6 is expressed in
quiescent myofibroblasts in idiopathic pulmonary fibrosis. Am J Respir Cell Mol
Biol. 2010 May;42(5):626-32. Epub 2009 Jul 13. PubMed PMID: 19597127.
41: Hirose H, Inaba H, Noguchi C, Tambara K, Yamamoto T, Yamasaki M, Kikuchi K,
Amano A. EuroSCORE predicts postoperative mortality, certain morbidities, and
recovery time. Interact Cardiovasc Thorac Surg. 2009 Oct;9(4):613-7. Epub 2009
Jul 13. PubMed PMID: 19596705.
42: Zhang WB, Li N, Wang GF, Li JS. [Application of abdominal packing in
non-trauma patients with severe abdominal hemorrhage]. Zhonghua Wai Ke Za Zhi.
2009 Mar 15;47(6):441-5. Chinese. PubMed PMID: 19595232.
43: Krüger S, Ewig S, Papassotiriou J, Kunde J, Marre R, von Baum H, Suttor N,
Welte T; CAPNETZ Study Group. Inflammatory parameters predict etiologic patterns
but do not allow for individual prediction of etiology in patients with CAP:
results from the German competence network CAPNETZ. Respir Res. 2009 Jul
12;10:65. PubMed PMID: 19594893; PubMed Central PMCID: PMC2714042.
44: Lee YL, Chen W, Chen LY, Chen CH, Lin YC, Liang SJ, Shih CM. Systemic and
bronchoalveolar cytokines as predictors of in-hospital mortality in severe
community-acquired pneumonia. J Crit Care. 2010 Mar;25(1):176.e7-13. Epub 2009
Jul 9. PubMed PMID: 19592208.
45: Chalmers JD. ICU admission and severity assessment in community-acquired
pneumonia. Crit Care. 2009;13(3):156. Epub 2009 Jun 15. PubMed PMID: 19591640;
PubMed Central PMCID: PMC2717437.
46: Lange P. Chronic obstructive pulmonary disease and risk of infection.
Pneumonol Alergol Pol. 2009;77(3):284-8. Review. PubMed PMID: 19591100.
47: Vandromme MJ, McGwin G Jr, Marques MB, Kerby JD, Rue LW 3rd, Weinberg JA.
Transfusion and pneumonia in the trauma intensive care unit: an examination of
the temporal relationship. J Trauma. 2009 Jul;67(1):97-101. PubMed PMID:
19590316
48: Rangel EL, Butler KL, Johannigman JA, Tsuei BJ, Solomkin JS. Risk factors for
relapse of ventilator-associated pneumonia in trauma patients. J Trauma. 2009
Jul;67(1):91-5; discussion 95-6. PubMed PMID: 19590315.
49: Mikaeilli H, Zarghami N, Yazdchi M, Mardani M, Ansarin K. On-admission level
of serum d-dimer and the severity of community-acquired pneumonia. Pak J Biol
Sci. 2009 Mar 15;12(6):514-7. PubMed PMID: 19580001.
50: Long W, Deng XQ, Tang JG, Xie J, Zhang YC, Zhang Y, Gao YY, Lu G. [The value
of serum procalcitonin in treatment of community acquired pneumonia in
outpatient]. Zhonghua Nei Ke Za Zhi. 2009 Mar;48(3):216-9. Chinese. PubMed PMID:
19576090
51: Yang W, He B, Shan Y. [High-resolution CT semi-quantitative score may have a
role in predicting short-term response to corticosteroid therapy in idiopathic
interstitial pneumonias]. Zhonghua Jie He He Hu Xi Za Zhi. 2009 Feb;32(2):124-7.
Chinese. PubMed PMID: 19567185.
52: Cham G, Yan S, Heng BH, Seow E. Predicting positive blood cultures in
patients presenting with pneumonia at an Emergency Department in Singapore. Ann
Acad Med Singapore. 2009 Jun;38(6):508-7. PubMed PMID: 19565101.
53: Brown JS. Biomarkers and community-acquired pneumonia. Thorax. 2009
Jul;64(7):556-8. PubMed PMID: 19561275.
54: Cabre M, Serra-Prat M, Palomera E, Almirall J, Pallares R, Clavé P.
Prevalence and prognostic implications of dysphagia in elderly patients with
pneumonia. Age Ageing. 2010 Jan;39(1):39-45. Epub 2009 Jun 26. PubMed PMID:
19561160
55: Coresh J. CKD prognosis: beyond the traditional outcomes. Am J Kidney Dis.
2009 Jul;54(1):1-3. PubMed PMID: 19559334.
56: Sajadieh A, Binici Z, Mouridsen MR, Nielsen OW, Hansen JF, Haugaard SB. Mild
hyponatremia carries a poor prognosis in community subjects. Am J Med. 2009
Jul;122(7):679-86. PubMed PMID: 19559171.
57: Falguera M, Trujillano J, Caro S, Menéndez R, Carratalà J, Ruiz-González A,
Vilà M, García M, Porcel JM, Torres A; NAC-CALIDAD (Proyecto Integrado de
Investigación de la Sociedad Española de Patología del Aparato Respiratorio sobre
Infecciones Respiratorias de Vías Bajas) Study Group. A prediction rule for
estimating the risk of bacteremia in patients with community-acquired pneumonia.
Clin Infect Dis. 2009 Aug 1;49(3):409-16. PubMed PMID: 19555286.
58: Delis S, Bakoyiannis A, Madariaga J, Bramis J, Tassopoulos N, Dervenis C.
Laparoscopic cholecystectomy in cirrhotic patients: the value of MELD score and
Child-Pugh classification in predicting outcome. Surg Endosc. 2010
Feb;24(2):407-12. Epub 2009 Jun 24. PubMed PMID: 19551433.
59: Kovacs JA, Masur H. Evolving health effects of Pneumocystis: one hundred
years of progress in diagnosis and treatment. JAMA. 2009 Jun 24;301(24):2578-85.
PubMed PMID: 19549975.
60: Myles PR, Hubbard RB, Gibson JE, Pogson Z, Smith CJ, McKeever TM. Pneumonia
mortality in a UK general practice population cohort. Eur J Public Health. 2009
Oct;19(5):521-6. Epub 2009 Jun 23. PubMed PMID: 19549803.
61: Murcia JM, González-Comeche J, Marín A, Barberán J, Granizo JJ, Aguilar L,
González-Moreno J, González-Pina B, López-Dupla M, Irurzun J; SCAPE Study Group.
Clinical response to ertapenem in severe community-acquired pneumonia: a
retrospective series in an elderly population. Clin Microbiol Infect. 2009
Nov;15(11):1046-50. Epub 2009 Jun 22. PubMed PMID: 19548926.
62: Hohenthal U, Hurme S, Helenius H, Heiro M, Meurman O, Nikoskelainen J,
Kotilainen P. Utility of C-reactive protein in assessing the disease severity and
complications of community-acquired pneumonia. Clin Microbiol Infect. 2009
Nov;15(11):1026-32. Epub 2009 Jun 22. PubMed PMID: 19548923.
63: Jesús Cremades M, Luiza de Souza-Galvão M, García JM, Menéndez R.
[Respiratory infections research: a perspective from the tuberculosis and
respiratory infections area (TIR)]. Arch Bronconeumol. 2009;45 Suppl 1:11-5.
Review. Spanish. PubMed PMID: 19303524.
64: Quadrelli S, Molinari L, Ciallella L, Spina JC, Sobrino E, Chertcoff J.
Radiological versus histopathological diagnosis of usual interstitial pneumonia
in the clinical practice: does it have any survival difference? Respiration.
2010;79(1):32-7. Epub 2009 Jun 19. PubMed PMID: 19546518.
65: Ramos A, Cuervas-Mons V, Noblejas A, Baños I, Duran P, Marcos R,
Sánchez-Turrión V, Jiménez M, Arellano B, Corbacho C, Sánchez-Romero I.
Breakthrough rhinocerebral mucormycosis in a liver transplant patient receiving
caspofungin. Transplant Proc. 2009 Jun;41(5):1972-5. PubMed PMID: 19545771.
66: Chen JS, Li LS, Cheng DR, Ji SM, Sun QQ, Cheng Z, Wen JQ, Sha GZ, Liu ZH.
Prognostic effect of lymphocyte subgroup CD4+ and CD8+ cells in peripheral blood
in renal transplant patients with cytomegalovirus viremia. Transplant Proc. 2009
Jun;41(5):1639-42. PubMed PMID: 19545698.
67: Husain S, Raza K, Pilewski JM, Zaldonis D, Crespo M, Toyoda Y, Shutt K,
Spichty K, Bentlejewski C, Pakstis DL, Carey ME, McCurry KR, Zeevi A. Experience
with immune monitoring in lung transplant recipients: correlation of low immune
function with infection. Transplantation. 2009 Jun 27;87(12):1852-7. PubMed PMID:
19543064
68: Nascimento-Carvalho CM, Cardoso MR, Brandileone MC, Ferrero F, Camargos P,
Berezin E, Ruvinsky R, Sant'anna C, March MF, Feris-Iglesias J, Maggi R,
Benguigui Y; CARIBE Group. Penicillin/ampicillin efficacy among children with
severe pneumonia due to penicillin-resistant pneumococcus (MIC=4 microg ml(-1)).
J Med Microbiol. 2009 Oct;58(Pt 10):1390-2. Epub 2009 Jun 18. PubMed PMID:
19541781
69: Singanayagam A, Chalmers JD, Hill AT. Admission hypoglycaemia is associated
with adverse outcome in community-acquired pneumonia. Eur Respir J. 2009
Oct;34(4):932-9. Epub 2009 Jun 18. PubMed PMID: 19541709.
70: Carvalho A, Cunha C, Carotti A, Aloisi T, Guarrera O, Di Ianni M, Falzetti F,
Bistoni F, Aversa F, Pitzurra L, Rodrigues F, Romani L. Polymorphisms in
Toll-like receptor genes and susceptibility to infections in allogeneic stem cell
transplantation. Exp Hematol. 2009 Sep;37(9):1022-9. Epub 2009 Jun 17. PubMed
PMID: 19539691.
71: Kranidioti H, Orfanos SE, Vaki I, Kotanidou A, Raftogiannis M, Dimopoulou I,
Kotsaki A, Savva A, Papapetropoulos A, Armaganidis A, Giamarellos-Bourboulis EJ.
Angiopoietin-2 is increased in septic shock: evidence for the existence of a
circulating factor stimulating its release from human monocytes. Immunol Lett.
2009 Jun 30;125(1):65-71. Epub 2009 Jun 17. PubMed PMID: 19539650.
72: Kodama Y, Takita M, Kawagoe S, Hirahara S, Kimura Y, Onozawa S, Wada T,
Nakano K, Kami M, Matsumura T, Yuji K. Retrospective study on home care for
patients with hematologic malignancies. Jpn J Clin Oncol. 2009 Sep;39(9):606-11.
Epub 2009 Jun 17. PubMed PMID: 19535385.
73: Doruk S, Tertemiz KC, Kömüs N, Uçan ES, Kilinç O, Sevinç C. Community
acquired pneumonia and direct hospital cost. Tuberk Toraks. 2009;57(1):48-55.
PubMed PMID: 19533437.
74: Atsumi E, Yara S, Higa F, Hirata T, Haranaga S, Tateyama M, Fujita J.
Influence of human T lymphotropic virus type I infection on the etiology of
community-acquired pneumonia. Intern Med. 2009;48(12):959-65. Epub 2009 Jun 15.
PubMed PMID: 19525581.
75: Rivera JJ, Nasir K, Cox PR, Choi EK, Yoon Y, Cho I, Chun EJ, Choi SI,
Blumenthal RS, Chang HJ. Association of traditional cardiovascular risk factors
with coronary plaque sub-types assessed by 64-slice computed tomography
angiography in a large cohort of asymptomatic subjects. Atherosclerosis. 2009
Oct;206(2):451-7. Epub 2009 May 29. PubMed PMID: 19524922.
76: Steenhard NR, Jungersen G, Kokotovic B, Beshah E, Dawson HD, Urban JF Jr,
Roepstorff A, Thamsborg SM. Ascaris suum infection negatively affects the
response to a Mycoplasma hyopneumoniae vaccination and subsequent challenge
infection in pigs. Vaccine. 2009 Aug 13;27(37):5161-9. Epub 2009 Jun 12. PubMed
PMID: 19524617.
77: Cai GY, Chen XM. Immunoglobulin A nephropathy in China: progress and
challenges. Am J Nephrol. 2009;30(3):268-73. Epub 2009 Jun 12. Review. PubMed
PMID: 19521068.
78: Baĭgozina EA, Sovalkin VI, Lukach VN. [Analysis of the clinical features and
outcome of ventilator-associated Pseudomonas aeruginosa-related pneumonia in an
intensive care unit]. Anesteziol Reanimatol. 2009 Mar-Apr;(2):62-4. Russian.
PubMed PMID: 19514444.
79: Simons JP, Shah SA, Ng SC, Whalen GF, Tseng JF. National complication rates
after pancreatectomy: beyond mere mortality. J Gastrointest Surg. 2009
Oct;13(10):1798-805. Epub 2009 Jun 9. PubMed PMID: 19506975.
80: Fischer A, Swigris JJ, du Bois RM, Lynch DA, Downey GP, Cosgrove GP, Frankel
SK, Fernandez-Perez ER, Gillis JZ, Brown KK. Anti-synthetase syndrome in ANA and
anti-Jo-1 negative patients presenting with idiopathic interstitial pneumonia.
Respir Med. 2009 Nov;103(11):1719-24. Epub 2009 Jun 3. PubMed PMID: 19497723;
PubMed Central PMCID: PMC2857337.
81: Burgmann H, Stoiser B, Heinz G, Schenk P, Apfalter P, Zedtwitz-Liebenstein K,
Frass M, Carmeli Y. Likelihood of inadequate treatment: a novel approach to
evaluating drug-resistance patterns. Infect Control Hosp Epidemiol. 2009
Jul;30(7):672-7. PubMed PMID: 19496644.
82: Wang X, Wang Y, Zhao X, Andersson R, Song Z, Yang D. Potential effects of
peroxisome proliferator-activated receptor activator on LPS-induced lung injury
in rats. Pulm Pharmacol Ther. 2009 Aug;22(4):318-25. PubMed PMID: 19489131.
83: Feng RE, Liu HR, Zhou WX, Shi JH, Tian XL, Wang HL, Ren XY, Ling Q, Cui QC.
[Intravascular lymphomatosis presenting in the lung]. Zhonghua Jie He He Hu Xi Za
Zhi. 2009 Jan;32(1):12-6. Chinese. PubMed PMID: 19484955.
84: Mirsaeidi M, Peyrani P, Ramirez JA; Improving Medicine through Pathway
Assessment of Critical Therapy of Hospital-Acquired Pneumonia (IMPACT-HAP)
Investigators. Predicting mortality in patients with ventilator-associated
pneumonia: The APACHE II score versus the new IBMP-10 score. Clin Infect Dis.
2009 Jul 1;49(1):72-7. PubMed PMID: 19480582.
85: Yohannes S, Chawla LS. Evolving practices in the management of acute kidney
injury in the ICU (Intensive Care Unit). Clin Nephrol. 2009 Jun;71(6):602-7.
PubMed PMID: 19473627.
86: Wu TY, Hsieh CC, Hong JJ, Chen CY, Tsai YS. IRSS: a web-based tool for
automatic layout and analysis of IRES secondary structure prediction and
searching system in silico. BMC Bioinformatics. 2009 May 27;10:160. PubMed PMID:
19473520; PubMed Central PMCID: PMC2698906.
87: Lampati L, Maggioni E, Langer M, Malacarne P, Mozzo R, Pesenti A, Fumagalli
R. Can routine surveillance samples from tracheal aspirate predict bacterial
flora in cases of ventilator-associated pneumonia? Minerva Anestesiol. 2009
Oct;75(10):555-62. Epub 2009 May 21. PubMed PMID: 19461563.
88: El Solh AA, Akinnusi ME, Alfarah Z, Patel A. Effect of antibiotic guidelines
on outcomes of hospitalized patients with nursing home-acquired pneumonia. J Am
Geriatr Soc. 2009 Jun;57(6):1030-5. Epub 2009 Apr 30. PubMed PMID: 19460091.
89: Bender JM, Ampofo K, Gesteland P, Stoddard GJ, Nelson D, Byington CL, Pavia
AT, Srivastava R. Development and validation of a risk score for predicting
hospitalization in children with influenza virus infection. Pediatr Emerg Care.
2009 Jun;25(6):369-75. PubMed PMID: 19458562.
90: Myles PR, Hubbard RB, Gibson JE, Pogson Z, Smith CJ, McKeever TM. The impact
of statins, ACE inhibitors and gastric acid suppressants on pneumonia mortality
in a UK general practice population cohort. Pharmacoepidemiol Drug Saf. 2009
Aug;18(8):697-703. PubMed PMID: 19455553.
91: Ewig S, Birkner N, Strauss R, Schaefer E, Pauletzki J, Bischoff H, Schraeder
P, Welte T, Hoeffken G. New perspectives on community-acquired pneumonia in 388
406 patients. Results from a nationwide mandatory performance measurement
programme in healthcare quality. Thorax. 2009 Dec;64(12):1062-9. Epub 2009 May
18. PubMed PMID: 19454409; PubMed Central PMCID: PMC2782114.
92: Taira BR, Fenton KE, Lee TK, Meng H, McCormack JE, Huang E, Singer AJ,
Scriven RJ, Shapiro MJ. Ventilator-associated pneumonia in pediatric trauma
patients. Pediatr Crit Care Med. 2009 Jul;10(4):491-4. PubMed PMID: 19451852.
93: James MT, Quan H, Tonelli M, Manns BJ, Faris P, Laupland KB, Hemmelgarn BR;
Alberta Kidney Disease Network. CKD and risk of hospitalization and death with
pneumonia. Am J Kidney Dis. 2009 Jul;54(1):24-32. Epub 2009 May 17. PubMed PMID:
19447535
94: Patterson AJ, U-King-Im JM, Tang TY, Scoffings DJ, Howarth SP, Graves MJ,
Gillard JH. Association between white matter ischaemia and carotid plaque
morphology as defined by high-resolution in vivo MRI. Eur J Vasc Endovasc Surg.
2009 Aug;38(2):149-54. Epub 2009 May 17. PubMed PMID: 19447050.
95: Sarkar PK, Patel N, Furie RA, Talwar A. Pulmonary manifestations of primary
Sjögren's syndrome. Indian J Chest Dis Allied Sci. 2009 Apr-Jun;51(2):93-101.
Review. PubMed PMID: 19445445.
96: Daimon T, Johkoh T, Honda O, Sumikawa H, Ichikado K, Kondoh Y, Taniguchi H,
Fujimoto K, Yanagawa M, Inoue A, Tomiyama N, Nakamura H, Sugiyama Y. Nonspecific
interstitial pneumonia associated with collagen vascular disease: analysis of CT
features to distinguish the various types. Intern Med. 2009;48(10):753-61. Epub
2009 May 15. PubMed PMID: 19443969.
97: Hondo FY, Maluf-Filho F, Kishi HS, Uemura RS, Okawa L, Cecconello I, Sakai P.
Predictive factors for local recurrence and incomplete resection of early gastric
cancer treated by endoscopic resection: a Western experience. Can J
Gastroenterol. 2009 May;23(5):357-63. PubMed PMID: 19440567; PubMed Central
PMCID: PMC2706749.
98: de Jager CP, de Wit NC, Weers-Pothoff G, van der Poll T, Wever PC.
Procalcitonin kinetics in Legionella pneumophila pneumonia. Clin Microbiol
Infect. 2009 Nov;15(11):1020-5. Epub 2009 Apr 24. PubMed PMID: 19438643.
99: Bathoorn E, Liesker JJ, Postma DS, Koëter GH, van der Toorn M, van der Heide
S, Ross HA, van Oosterhout AJ, Kerstjens HA. Change in inflammation in
out-patient COPD patients from stable phase to a subsequent exacerbation. Int J
Chron Obstruct Pulmon Dis. 2009;4:101-9. Epub 2009 Apr 15. PubMed PMID: 19436694;
PubMed Central PMCID: PMC2672798.
100: Kashiwagi M, Tanaka A, Kitabata H, Tsujioka H, Matsumoto H, Arita Y, Ookochi
K, Kuroi A, Kataiwa H, Tanimoto T, Ikejima H, Takarada S, Kubo T, Hirata K,
Nakamura N, Mizukoshi M, Imanishi T, Akasaka T. Relationship between coronary
arterial remodeling, fibrous cap thickness and high-sensitivity C-reactive
protein levels in patients with acute coronary syndrome. Circ J. 2009
Jul;73(7):1291-5. Epub 2009 May 12. PubMed PMID: 19436122.
101: Rello J, Lisboa T, Lujan M, Gallego M, Kee C, Kay I, Lopez D, Waterer GW;
DNA-Neumococo Study Group. Severity of pneumococcal pneumonia associated with
genomic bacterial load. Chest. 2009 Sep;136(3):832-40. Epub 2009 May 11. PubMed
PMID: 19433527.
102: Morris JA Jr, Francois C, Olson PK, Cotton BA, Summar M, Jenkins JM, Norris
PR, Moore JH, Williams AE, McNew BS, Canter JA. Genetic variation in complement
component 2 of the classical complement pathway is associated with increased
mortality and infection: a study of 627 patients with trauma. J Trauma. 2009
May;66(5):1265-70; discussion 1270-2. PubMed PMID: 19430225; PubMed Central
PMCID: PMC2697907.
103: Takahashi T. [Mutations of drug target molecules in Pneumocystis jirovecii
isolates and future investigations]. Nippon Ishinkin Gakkai Zasshi.
2009;50(2):67-73. Review. Japanese. PubMed PMID: 19430180.
104: Sekine H, Taguchi H, Watanabe H, Kawai S, Fujioka Y, Goto H, Kobayashi H,
Kamiya S. Immunological analysis and pathological examination of gnotobiotic mice
monoassociated with Mycoplasma pneumoniae. J Med Microbiol. 2009 Jun;58(Pt
6):697-705. PubMed PMID: 19429744.
105: Castellvi J, Garcia A, Ruiz-Marcellan C, Hernández-Losa J, Peg V, Salcedo M,
Gil-Moreno A, Ramon y Cajal S. Cell signaling in endometrial carcinoma:
phosphorylated 4E-binding protein-1 expression in endometrial cancer correlates
with aggressive tumors and prognosis. Hum Pathol. 2009 Oct;40(10):1418-26. Epub
2009 May 9. PubMed PMID: 19428047.
106: Winchester CC, Macfarlane TV, Thomas M, Price D. Antibiotic prescribing and
outcomes of lower respiratory tract infection in UK primary care. Chest. 2009
May;135(5):1163-72. PubMed PMID: 19420194.
107: Waterer GW. Limiting antibiotic use in lower respiratory tract infections:
have we gone too far? Chest. 2009 May;135(5):1118-20. PubMed PMID: 19420190.
108: Lee G, Walser TC, Dubinett SM. Chronic inflammation, chronic obstructive
pulmonary disease, and lung cancer. Curr Opin Pulm Med. 2009 Jul;15(4):303-7.
Review. PubMed PMID: 19417670.
109: Naidech AM, Bassin SL, Garg RK, Ault ML, Bendok BR, Batjer HH, Watts CM,
Bleck TP. Cardiac troponin I and acute lung injury after subarachnoid hemorrhage.
Neurocrit Care. 2009;11(2):177-82. Epub 2009 Apr 30. PubMed PMID: 19407934.
110: Herruzo R, Banegas JR, de la Cruz JJ, Muñoz-Ratero S, Garcia-Torres V.
[Impact of infection on mortality in burn patients. Multivariate study in 1,773
intensive care unit patients]. Enferm Infecc Microbiol Clin. 2009
Dec;27(10):580-4. Epub 2009 May 5. Spanish. PubMed PMID: 19406528.
111: Krüger S, Ewig S, Kunde J, Hanschmann A, Marre R, Suttorp N, Welte T;
CAPNETZ Study Group. C-terminal provasopressin (copeptin) in patients with
community-acquired pneumonia--influence of antibiotic pre-treatment: results from
the German competence network CAPNETZ. J Antimicrob Chemother. 2009
Jul;64(1):159-62. Epub 2009 Apr 29. PubMed PMID: 19403654.
112: Madeddu G, Fois AG, Pirina P, Mura MS. Pneumococcal pneumonia: clinical
features, diagnosis and management in HIV-infected and HIV noninfected patients.
Curr Opin Pulm Med. 2009 May;15(3):236-42. Review. PubMed PMID: 19399965.
113: Park SH, Kwon SJ, Lee SJ, Kim YC, Hwang KY, Kang YH, Lee KJ. Identification
of immunogenic antigen candidate for Chlamydophila pneumoniae diagnosis. J
Proteome Res. 2009 Jun;8(6):2933-43. Erratum in: J Proteome Res. 2009
Sep;8(9):4392. PubMed PMID: 19397283.
114: Uchida K, Yazumi S, Nishio A, Kusuda T, Koyabu M, Fukata M, Miyoshi H,
Sakaguchi Y, Fukui T, Matsushita M, Takaoka M, Okazaki K. Long-term outcome of
autoimmune pancreatitis. J Gastroenterol. 2009;44(7):726-32. Epub 2009 Apr 25.
PubMed PMID: 19396390.
115: des Portes V. [Long-term follow-up of bacterial meningitis - sequels in
children and adults: incidence, type, and assessment issues]. Med Mal Infect.
2009 Jul-Aug;39(7-8):572-80. Epub 2009 Apr 24. French. PubMed PMID: 19394175.
116: Sinto R, Nasution SA. Pregnancy in a woman with uncorrected tetralogy of
fallot. Acta Med Indones. 2009 Apr;41(2):81-6. PubMed PMID: 19390127.
117: Carbonara S, Monno L, Longo B, Angarano G. Community-acquired pneumonia.
Curr Opin Pulm Med. 2009 May;15(3):261-73. Review. PubMed PMID: 19387263.
118: Phua J, See KC, Chan YH, Widjaja LS, Aung NW, Ngerng WJ, Lim TK. Validation
and clinical implications of the IDSA/ATS minor criteria for severe
community-acquired pneumonia. Thorax. 2009 Jul;64(7):598-603. Epub 2009 Apr 21.
PubMed PMID: 19386583.
119: Ho YC, Wang JL, Wang JT, Wu UI, Chang CW, Wu HS, Chen CH, Chuang YM, Chang
SC. Prognostic factors for fatal adult influenza pneumonia. J Infect. 2009
Jun;58(6):439-45. Epub 2009 Mar 25. PubMed PMID: 19386366.
120: Sadjadi J, Cureton EL, Twomey P, Victorino GP. Transfusion, not just injury
severity, leads to posttrauma infection: a matched cohort study. Am Surg. 2009
Apr;75(4):307-12. PubMed PMID: 19385290.
121: Tanaka A, Imanishi T, Kitabata H, Kubo T, Takarada S, Tanimoto T, Kuroi A,
Tsujioka H, Ikejima H, Komukai K, Kataiwa H, Okouchi K, Kashiwaghi M, Ishibashi
K, Matsumoto H, Takemoto K, Nakamura N, Hirata K, Mizukoshi M, Akasaka T.
Lipid-rich plaque and myocardial perfusion after successful stenting in patients
with non-ST-segment elevation acute coronary syndrome: an optical coherence
tomography study. Eur Heart J. 2009 Jun;30(11):1348-55. Epub 2009 Apr 21. PubMed
PMID: 19383736.
122: Sankhala K, Mita A, Kelly K, Mahalingam D, Giles F, Mita M. The emerging
safety profile of mTOR inhibitors, a novel class of anticancer agents. Target
Oncol. 2009 Apr;4(2):135-42. Epub 2009 Apr 21. Review. PubMed PMID: 19381454.
123: Patel HJ, Williams DM, Upchurch GR Jr, Dasika NL, Eliason JL, Deeb GM. Late
outcomes of endovascular aortic repair for the infected thoracic aorta. Ann
Thorac Surg. 2009 May;87(5):1366-71; discussion 1371-2. PubMed PMID: 19379865.
124: Alonso-Ojembarrena A, Alvarez-Coca González J, Tarragó Asensio D, Casado
Flores J. [Pneumococcal pneumonia in children. Predictive factors of outcome]. An
Pediatr (Barc). 2009 May;70(5):514-5. Epub 2009 Apr 18. Spanish. PubMed PMID:
19376756
125: Gil H, Meaux Ruault N, Hafsaoui C, Dupond JL, Magy-Bertrand N. Management of
infectious pneumonia: value of C-reactive protein. Am J Med. 2009 May;122(5):e11;
author reply e13. PubMed PMID: 19375533.
126: Pittayanon R, Treeprasertsuk S, Phanthumchinda K. Plasmapheresis or
intravenous immunoglobulin for myasthenia gravis crisis in King Chulalongkorn
Memorial Hospital. J Med Assoc Thai. 2009 Apr;92(4):478-82. PubMed PMID:
19374297
127: Schuette K, Folprecht G, Kretzschmar A, Link H, Koehne CH, Gruenwald V,
Stahl M, Huebner G. Phase II trial of capecitabine and oxaliplatin in patients
with adeno- and undifferentiated carcinoma of unknown primary. Onkologie. 2009
Apr;32(4):162-6. Epub 2009 Mar 13. PubMed PMID: 19372710.
128: Snijders D, van der Eerden M, de Graaff C, Boersma W. The influence of COPD
on mortality and severity scoring in community-acquired pneumonia. Respiration.
2010;79(1):46-53. Epub 2009 Apr 16. PubMed PMID: 19372638.
129: Gacouin A, Leveiller G, Guy T, Salomon S, Isslame S, Jouannic I, Delaval P,
Le Tulzo Y. [Long term survival in chronic obstructive pulmonary disease after
ventilation in intensive care]. Rev Mal Respir. 2009 Mar;26(3):257-65. French.
PubMed PMID: 19367199.
130: Li DR, Michiue T, Zhu BL, Ishikawa T, Quan L, Zhao D, Yoshida C, Chen JH,
Wang Q, Komatsu A, Azuma Y, Maeda H. Evaluation of postmortem S100B levels in the
cerebrospinal fluid with regard to the cause of death in medicolegal autopsy. Leg
Med (Tokyo). 2009 Apr;11 Suppl 1:S273-5. Epub 2009 Apr 14. PubMed PMID: 19366640.
131: Huang DT, Angus DC, Kellum JA, Pugh NA, Weissfeld LA, Struck J, Delude RL,
Rosengart MR, Yealy DM. Midregional proadrenomedullin as a prognostic tool in
community-acquired pneumonia. Chest. 2009 Sep;136(3):823-31. Epub 2009 Apr 10.
PubMed PMID: 19363212; PubMed Central PMCID: PMC2818411.
132: Calbo E, Valdés E, Ochoa de Echagüen A, Fleites A, Molinos L, Xercavins M,
Freixas N, Rodríguez-Carballeira M, Garau J. Bacteraemic pneumococcal pneumonia
in COPD patients: better outcomes than expected. Eur J Clin Microbiol Infect Dis.
2009 Aug;28(8):971-6. Epub 2009 Apr 10. PubMed PMID: 19360444.
133: Probst C, Zelle BA, Sittaro NA, Lohse R, Krettek C, Pape HC. Late death
after multiple severe trauma: when does it occur and what are the causes? J
Trauma. 2009 Apr;66(4):1212-7. PubMed PMID: 19359940.
134: File TM. The science of selecting antimicrobials for community-acquired
pneumonia (CAP). J Manag Care Pharm. 2009 Mar;15(2 Suppl):S5-11. PubMed PMID:
19236135
135: Niederman MS. Making sense of scoring systems in community acquired
pneumonia. Respirology. 2009 Apr;14(3):327-35. Review. PubMed PMID: 19353770.
136: Pilotto A, Addante F, Ferrucci L, Leandro G, D'Onofrio G, Corritore M, Niro
V, Scarcelli C, Dallapiccola B, Franceschi M. The multidimensional prognostic
index predicts short- and long-term mortality in hospitalized geriatric patients
with pneumonia. J Gerontol A Biol Sci Med Sci. 2009 Aug;64(8):880-7. Epub 2009
Apr 6. PubMed PMID: 19349589.
137: Nojima D, Ozaki S, Fujii Y, Wada S, Ono K, Fujimoto N, Gemba K, Kishimoto T.
[A case of miliary tuberculosis presenting with acute resiratory distress
syndrome]. Nihon Kokyuki Gakkai Zasshi. 2009 Mar;47(3):195-9. Japanese. PubMed
PMID: 19348265.
138: Yende S, Angus DC, Kong L, Kellum JA, Weissfeld L, Ferrell R, Finegold D,
Carter M, Leng L, Peng ZY, Bucala R. The influence of macrophage migration
inhibitory factor gene polymorphisms on outcome from community-acquired
pneumonia. FASEB J. 2009 Aug;23(8):2403-11. Epub 2009 Apr 3. PubMed PMID:
19346297; PubMed Central PMCID: PMC2717777.
139: D'Amico TA. Surgery for esophageal cancer. Gastrointest Cancer Res. 2008
Jul;2(4 Suppl):S6-9. PubMed PMID: 19343153; PubMed Central PMCID: PMC2661551.
140: O'Reilly KE, Warycha M, Davies MA, Rodrik V, Zhou XK, Yee H, Polsky D,
Pavlick AC, Rosen N, Bhardwaj N, Mills G, Osman I. Phosphorylated 4E-BP1 is
associated with poor survival in melanoma. Clin Cancer Res. 2009 Apr
15;15(8):2872-8. Epub 2009 Mar 31. PubMed PMID: 19336517.
141: Palizas F, Dubin A, Regueira T, Bruhn A, Knobel E, Lazzeri S, Baredes N,
Hernández G. Gastric tonometry versus cardiac index as resuscitation goals in
septic shock: a multicenter, randomized, controlled trial. Crit Care.
2009;13(2):R44. Epub 2009 Mar 31. PubMed PMID: 19335912; PubMed Central PMCID:
PMC2689488.
142: Morris AM. Study conclusions should reflect results. CMAJ. 2009 Mar
31;180(7):738; author reply 738. PubMed PMID: 19332757; PubMed Central PMCID:
PMC2659840.
143: Mamtani M, Patel A, Hibberd PL, Tuan TA, Jeena P, Chisaka N, Hassan M,
Radovan IM, Thea DM, Qazi S, Kulkarni H. A clinical tool to predict failed
response to therapy in children with severe pneumonia. Pediatr Pulmonol. 2009
Apr;44(4):379-86. PubMed PMID: 19330771.
144: Gruber M, Christ-Crain M, Stolz D, Keller U, Müller C, Bingisser R, Tamm M,
Mueller B, Schuetz P. Prognostic impact of plasma lipids in patients with lower
respiratory tract infections - an observational study. Swiss Med Wkly. 2009 Mar
21;139(11-12):166-72. PubMed PMID: 19330560.
145: Ross JS. Breast cancer biomarkers and HER2 testing after 10 years of
anti-HER2 therapy. Drug News Perspect. 2009 Mar;22(2):93-106. Review. PubMed
PMID: 19330168.
146: Vermeij FH, Scholte op Reimer WJ, de Man P, van Oostenbrugge RJ, Franke CL,
de Jong G, de Kort PL, Dippel DW; Netherlands Stroke Survey Investigators.
Stroke-associated infection is an independent risk factor for poor outcome after
acute ischemic stroke: data from the Netherlands Stroke Survey. Cerebrovasc Dis.
2009;27(5):465-71. Epub 2009 Mar 28. PubMed PMID: 19329851.
147: Eizadi-Mood N, Saghaei M, Alfred S, Zargarzadeh AH, Huynh C, Gheshlaghi F,
Yaraghi A, Saad YS. Comparative evaluation of Glasgow Coma Score and gag reflex
in predicting aspiration pneumonitis in acute poisoning. J Crit Care. 2009
Sep;24(3):470.e9-15. Epub 2009 Jan 17. PubMed PMID: 19327309.
148: Hussell T, Wissinger E, Goulding J. Bacterial complications during pandemic
influenza infection. Future Microbiol. 2009 Apr;4:269-72. PubMed PMID: 19327113.
149: Ramírez P, Ferrer M, Gimeno R, Tormo S, Valencia M, Piñer R, Menendez R,
Torres A. Systemic inflammatory response and increased risk for
ventilator-associated pneumonia: a preliminary study. Crit Care Med. 2009
May;37(5):1691-5. PubMed PMID: 19325465.
150: Iso Y, Sawada T, Tagaya N, Kato M, Rokkaku K, Shimoda M, Kita J, Kubota K.
Pancreatic juice leakage is a risk factor for deep mycosis after pancreatic
surgery. Surg Today. 2009;39(4):326-31. Epub 2009 Mar 25. PubMed PMID: 19319641.
151: Martínez D, Alvarez Rodríguez V, Ortiz de Zárate MM, Rivas M, Giménez MJ,
Aguilar L, Ruiz Polaina MJ, Barberán J, Prieto J; CAPEM Study Group. Management
in the emergency room of patients requiring hospital treatment of
community-acquired pneumonia. Rev Esp Quimioter. 2009 Mar;22(1):4-9. PubMed PMID:
19308740
152: Garcia-Vidal C, Carratalà J, Díaz V, Dorca J, Verdaguer R, Manresa F, Gudiol
F. [Factors associated with prolonged hospital stay in community-acquired
pneumonia.]. Enferm Infecc Microbiol Clin. 2009 Mar;27(3):160-4. Epub 2009 Feb
11. Spanish. PubMed PMID: 19306716.
153: Dartois N, Castaing N, Gandjini H, Cooper A; Tigecycline 313 Study Group.
Tigecycline versus levofloxacin for the treatment of community-acquired
pneumonia: European experience. J Chemother. 2008 Oct;20 Suppl 1:28-35. PubMed
PMID: 19036672.
154: Navsaria PH, Nicol AJ, Krige JE, Edu S. Selective nonoperative management of
liver gunshot injuries. Ann Surg. 2009 Apr;249(4):653-6. PubMed PMID: 19300222.
155: Frangoul H, Koyama T, Domm J. Etanercept for treatment of idiopathic
pneumonia syndrome after allogeneic hematopoietic stem cell transplantation.
Blood. 2009 Mar 19;113(12):2868-9; author reply 2869. PubMed PMID: 19299655.
156: Austin HA 3rd, Illei GG, Braun MJ, Balow JE. Randomized, controlled trial of
prednisone, cyclophosphamide, and cyclosporine in lupus membranous nephropathy. J
Am Soc Nephrol. 2009 Apr;20(4):901-11. Epub 2009 Mar 18. PubMed PMID: 19297556;
PubMed Central PMCID: PMC2663831.
157: Polverino E, Torres A. Current perspective of the HCAP problem: is it CAP or
is it HAP? Semin Respir Crit Care Med. 2009 Apr;30(2):239-48. Epub 2009 Mar 18.
Review. PubMed PMID: 19296421.
158: Lynch JP 3rd, Zhanel GG. Streptococcus pneumoniae: does antimicrobial
resistance matter? Semin Respir Crit Care Med. 2009 Apr;30(2):210-38. Epub 2009
Mar 18. Review. PubMed PMID: 19296420.
159: Martínez R, Reyes S, Lorenzo MJ, Menéndez R. Impact of guidelines on
outcome: the evidence. Semin Respir Crit Care Med. 2009 Apr;30(2):172-8. Epub
2009 Mar 18. Review. PubMed PMID: 19296417.
160: Garcia-Vidal C, Carratalà J. Early and late treatment failure in
community-acquired pneumonia. Semin Respir Crit Care Med. 2009 Apr;30(2):154-60.
Epub 2009 Mar 18. Review. PubMed PMID: 19296415.
161: Yokohama S, Aoshima M, Nakade Y, Shindo J, Maruyama J, Yoneda M.
Investigation and prediction of enteral nutrition problems after percutaneous
endoscopic gastrostomy. World J Gastroenterol. 2009 Mar 21;15(11):1367-72. PubMed
PMID: 19294767; PubMed Central PMCID: PMC2658839.
162: Tessmer A, Welte T, Martus P, Schnoor M, Marre R, Suttorp N. Impact of
intravenous {beta}-lactam/macrolide versus {beta}-lactam monotherapy on mortality
in hospitalized patients with community-acquired pneumonia. J Antimicrob
Chemother. 2009 May;63(5):1025-33. Epub 2009 Mar 17. PubMed PMID: 19293196.
163: Chen CZ, Fan PS, Lin CC, Lee CH, Hsiue TR. Repeated pneumonia severity index
measurement after admission increases its predictive value for mortality in
severe community-acquired pneumonia. J Formos Med Assoc. 2009 Mar;108(3):219-23.
PubMed PMID: 19293037.
164: Aslanabadi S, Jamshidi M, Tubbs RS, Shoja MM. The role of prophylactic chest
drainage in the operative management of esophageal atresia with tracheoesophageal
fistula. Pediatr Surg Int. 2009 Apr;25(4):365-8. Epub 2009 Mar 17. PubMed PMID:
19290533
165: Cabellos C, Verdaguer R, Olmo M, Fernández-Sabé N, Cisnal M, Ariza J, Gudiol
F, Viladrich PF. Community-acquired bacterial meningitis in elderly patients:
experience over 30 years. Medicine (Baltimore). 2009 Mar;88(2):115-9. PubMed
PMID: 19282702.
166: Bruns AH, Oosterheert JJ, Hustinx WN, Gaillard CA, Hak E, Hoepelman AI. Time
for first antibiotic dose is not predictive for the early clinical failure of
moderate-severe community-acquired pneumonia. Eur J Clin Microbiol Infect Dis.
2009 Aug;28(8):913-9. Epub 2009 Mar 12. PubMed PMID: 19280235; PubMed Central
PMCID: PMC2723669.
167: Marcos MA, Esperatti M, Torres A. Viral pneumonia. Curr Opin Infect Dis.
2009 Apr;22(2):143-7. Review. PubMed PMID: 19276881.
168: Cabre M. Pneumonia in the elderly. Curr Opin Pulm Med. 2009 May;15(3):223-9.
Review. PubMed PMID: 19276811.
169: Lin SM, Wang TY, Liu WT, Chang CC, Lin HC, Liu CY, Wang CH, Huang CD, Lee
KY, Kuo HP. Predictive factors for mortality among non-HIV-infected patients with
pulmonary tuberculosis and respiratory failure. Int J Tuberc Lung Dis. 2009
Mar;13(3):335-40. PubMed PMID: 19275793.
170: Antiretroviral Therapy Cohort Collaboration (ART-CC), Mocroft A, Sterne JA,
Egger M, May M, Grabar S, Furrer H, Sabin C, Fatkenheuer G, Justice A, Reiss P,
d'Arminio Monforte A, Gill J, Hogg R, Bonnet F, Kitahata M, Staszewski S,
Casabona J, Harris R, Saag M. Variable impact on mortality of AIDS-defining
events diagnosed during combination antiretroviral therapy: not all AIDS-defining
conditions are created equal. Clin Infect Dis. 2009 Apr 15;48(8):1138-51. PubMed
PMID: 19275498.
171: Cesaro S, Tridello G, Cavaliere M, Magagna L, Gavin P, Cusinato R, Zadra N,
Franco Zanon G, Zanesco L, Carli M. Prospective, randomized trial of two
different modalities of flushing central venous catheters in pediatric patients
with cancer. J Clin Oncol. 2009 Apr 20;27(12):2059-65. Epub 2009 Mar 9. Erratum
in: J Clin Oncol. 2010 Feb 1;28(4):708. PubMed PMID: 19273702.
172: Zeng T, Zou YQ, Wu MF, Yang CD. Clinical features and prognosis of
adult-onset still's disease: 61 cases from China. J Rheumatol. 2009
May;36(5):1026-31. Epub 2009 Feb 27. PubMed PMID: 19273456.
173: Kelly E, MacRedmond RE, Cullen G, Greene CM, McElvaney NG, O'Neill SJ.
Community-acquired pneumonia in older patients: does age influence systemic
cytokine levels in community-acquired pneumonia? Respirology. 2009
Mar;14(2):210-6. PubMed PMID: 19272082.
174: Lu S, Duffin R, Poland C, Daly P, Murphy F, Drost E, Macnee W, Stone V,
Donaldson K. Efficacy of simple short-term in vitro assays for predicting the
potential of metal oxide nanoparticles to cause pulmonary inflammation. Environ
Health Perspect. 2009 Feb;117(2):241-7. Epub 2008 Sep 17. PubMed PMID: 19270794;
PubMed Central PMCID: PMC2649226.
175: Carballo S, Garin N, Gerstel E, Perrier A, Nendaz M. [Update in hospital
medicine 2008]. Rev Med Suisse. 2009 Jan 28;5(188):244-50. Review. French. PubMed
PMID: 19267052.
176: Saito M, Gunji Y, Kashii Y, Odaka J, Yamauchi T, Kanai N, Momoi MY.
Refractory kaposiform hemangioendothelioma that expressed vascular endothelial
growth factor receptor (VEGFR)-2 and VEGFR-3: a case report. J Pediatr Hematol
Oncol. 2009 Mar;31(3):194-7. PubMed PMID: 19262246.
177: Herrmann-Hoesing LM, Noh SM, White SN, Snekvik KR, Truscott T, Knowles DP.
Peripheral ovine progressive pneumonia provirus levels correlate with and predict
histological tissue lesion severity in naturally infected sheep. Clin Vaccine
Immunol. 2009 Apr;16(4):551-7. Epub 2009 Mar 4. PubMed PMID: 19261772; PubMed
Central PMCID: PMC2668279.
178: Neurohr C, Behr J. [Diagnosis and therapy of interstitial lung diseases].
Dtsch Med Wochenschr. 2009 Mar;134(11):524-9. Epub 2009 Mar 3. Review. German.
PubMed PMID: 19259911.
179: Chang AB, Clark R, Acworth JP, Petsky HL, Sloots TP. The impact of viral
respiratory infection on the severity and recovery from an asthma exacerbation.
Pediatr Infect Dis J. 2009 Apr;28(4):290-4. PubMed PMID: 19258918.
180: Wright CD, Kucharczuk JC, O'Brien SM, Grab JD, Allen MS; Society of Thoracic
Surgeons General Thoracic Surgery Database. Predictors of major morbidity and
mortality after esophagectomy for esophageal cancer: a Society of Thoracic
Surgeons General Thoracic Surgery Database risk adjustment model. J Thorac
Cardiovasc Surg. 2009 Mar;137(3):587-95; discussion 596. Erratum in: J Thorac
Cardiovasc Surg. 2009 Jun;137(6):1581. PubMed PMID: 19258071.
181: Bello G, Pennisi MA, Montini L, Silva S, Maviglia R, Cavallaro F, Bianchi A,
De Marinis L, Antonelli M. Nonthyroidal illness syndrome and prolonged mechanical
ventilation in patients admitted to the ICU. Chest. 2009 Jun;135(6):1448-54. Epub
2009 Mar 2. PubMed PMID: 19255297.
182: Song JW, Do KH, Kim MY, Jang SJ, Colby TV, Kim DS. Pathologic and radiologic
differences between idiopathic and collagen vascular disease-related usual
interstitial pneumonia. Chest. 2009 Jul;136(1):23-30. Epub 2009 Mar 2. PubMed
PMID: 19255290.
183: Lin MC, Chen YC, Wu JT, Ko YC, Wang CC. Diagnostic and prognostic values of
pleural fluid procalcitonin in parapneumonic pleural effusions. Chest. 2009
Jul;136(1):205-11. Epub 2009 Mar 2. PubMed PMID: 19255287.
184: Power ML, Hamdy S, Goulermas JY, Tyrrell PJ, Turnbull I, Thompson DG.
Predicting aspiration after hemispheric stroke from timing measures of
oropharyngeal bolus flow and laryngeal closure. Dysphagia. 2009 Sep;24(3):257-64.
Epub 2009 Feb 28. PubMed PMID: 19252944.
185: Sparber-Sauer M, Hönig M, Schulz AS, zur Stadt U, Schütz C, Debatin KM,
Friedrich W. Patients with early relapse of primary hemophagocytic syndromes or
with persistent CNS involvement may benefit from immediate hematopoietic stem
cell transplantation. Bone Marrow Transplant. 2009 Sep;44(6):333-8. Epub 2009 Mar
2. PubMed PMID: 19252534.
186: Sano Y, Hermsen JL, Kang W, Gomez FE, Lan J, Maeshima Y, Kudsk KA.
Parenteral nutrition maintains pulmonary IgA antibody transport capacity, but not
active transport, following injury. Am J Surg. 2009 Jul;198(1):105-9. Epub 2009
Feb 27. PubMed PMID: 19249732; PubMed Central PMCID: PMC2755078.
187: Umeda Y, Demura Y, Ishizaki T, Ameshima S, Miyamori I, Saito Y, Tsuchida T,
Fujibayashi Y, Okazawa H. Dual-time-point 18F-FDG PET imaging for diagnosis of
disease type and disease activity in patients with idiopathic interstitial
pneumonia. Eur J Nucl Med Mol Imaging. 2009 Jul;36(7):1121-30. Epub 2009 Feb 27.
PubMed PMID: 19247654.
188: Chen IJ, Jan Wu YJ, Lin CW, Fan KW, Luo SF, Ho HH, Liou LB, Tsai WP, Chen
JY, Yang CH, Kuo CF, Yu KH. Interstitial lung disease in polymyositis and
dermatomyositis. Clin Rheumatol. 2009 Jun;28(6):639-46. Epub 2009 Feb 27. PubMed
PMID: 19247576.
189: Grabicki M, Parysek H, Batura-Gabryel H, Brodnicka I. Comorbidities as an
element of multidimensional prognostic assessment of patients with chronic
obstructive pulmonary disease. J Physiol Pharmacol. 2008 Dec;59 Suppl 6:297-301.
PubMed PMID: 19218653.
190: Dahl JJ, Dumont DM, Allen JD, Miller EM, Trahey GE. Acoustic radiation force
impulse imaging for noninvasive characterization of carotid artery
atherosclerotic plaques: a feasibility study. Ultrasound Med Biol. 2009
May;35(5):707-16. Epub 2009 Feb 25. PubMed PMID: 19243877; PubMed Central PMCID:
PMC2813205.
191: Schumacher G, Schlechtweg N, Chopra SS, Rösch T, Veltzke-Schlieker W,
Thuss-Patience P, Schmidt SC, Neuhaus P. [Impact of the body mass index on the
prognosis and complication rate after surgical resection of cancers at the
oesophagogastric junction]. Zentralbl Chir. 2009 Feb;134(1):66-70. Epub 2009 Feb
25. German. PubMed PMID: 19242885.
192: Rossetti AO, Oddo M, Liaudet L, Kaplan PW. Predictors of awakening from
postanoxic status epilepticus after therapeutic hypothermia. Neurology. 2009 Feb
24;72(8):744-9. PubMed PMID: 19237704.
193: Capelastegui A, España PP, Quintana JM, Bilbao A, Menendez R, Zalacain R,
Torres A. Development of a prognostic index for 90-day mortality in patients
discharged after admission to hospital for community-acquired pneumonia. Thorax.
2009 Jun;64(6):496-501. Epub 2009 Feb 22. PubMed PMID: 19237392.
194: Lu G, Xie ZD, Zhao SY, Ye LJ, Wu RH, Liu CY, Yang S, Jin YK, Shen KL.
Clinical analysis and follow-up study of chronic active Epstein-Barr virus
infection in 53 pediatric cases. Chin Med J (Engl). 2009 Feb 5;122(3):262-6.
PubMed PMID: 19236801.
195: Frei CR, Jaso TC, Mortensen EM, Restrepo MI, Raut MK, Oramasionwu CU, Ruiz
AD, Makos BR, Ruiz JL, Attridge RT, Mody SH, Fisher A, Schein JR. Medical
resource utilization among community-acquired pneumonia patients initially
treated with levofloxacin 750 mg daily versus ceftriaxone 1000 mg plus
azithromycin 500 mg daily: a US-based study. Curr Med Res Opin. 2009
Apr;25(4):859-68. PubMed PMID: 19231913.
196: Markert E, Siebolts U, Odenthal M, Kreuzer KA, Wickenhauser C. High
diagnostic value of morphologic examination and molecular analysis of bone marrow
biopsies in a case of BCR-ABL+ CML with clusters of blasts. Int J Hematol. 2009
Apr;89(3):294-7. Epub 2009 Feb 20. PubMed PMID: 19229589.
197: van der Steen JT, Ribbe MW. [Pneumonia mortality risk in patients with
dementia: nursing home physicians' use and evaluation of a prognostic score].
Tijdschr Gerontol Geriatr. 2008 Dec;39(6):233-44. Dutch. PubMed PMID: 19227591.
198: Deliens L, Brandt HE, Ribbe MW. [The end of life in Dutch nursing homes].
Tijdschr Gerontol Geriatr. 2008 Dec;39(6):224-32. Dutch. PubMed PMID: 19227590.
199: Ristoiu D, von Gunten U, Mocan A, Chira R, Siegfried B, Haydee Kovacs M,
Vancea S. Trihalomethane formation during water disinfection in four water
supplies in the Somes river basin in Romania. Environ Sci Pollut Res Int. 2009
Aug;16 Suppl 1:S55-65. Epub 2009 Feb 14. PubMed PMID: 19219474.
200: Zhang H, Chen H, Niu J, Wang Y, Xie L. Role of adaptive immunity in the
pathogenesis of Candida albicans keratitis. Invest Ophthalmol Vis Sci. 2009
Jun;50(6):2653-9. Epub 2009 Feb 14. Erratum in: Invest Ophthalmol Vis Sci. 2009
Oct;50(10):4551. PubMed PMID: 19218608.
201: Kin Key N, Araújo-Neto CA, Nascimento-Carvalho CM. Severity of childhood
community-acquired pneumonia and chest radiographic findings. Pediatr Pulmonol.
2009 Mar;44(3):249-52. PubMed PMID: 19205052.
202: Hadjizacharia P, Green DJ, Plurad D, Chan LS, Law J, Inaba K, Demetriades D.
Cocaine use in trauma: effect on injuries and outcomes. J Trauma. 2009
Feb;66(2):491-4. PubMed PMID: 19204526.
203: Chalmers JD, Singanayagam A, Scally C, Hill AT. Admission D-dimer can
identify low-risk patients with community-acquired pneumonia. Ann Emerg Med. 2009
May;53(5):633-8. Epub 2009 Feb 7. PubMed PMID: 19201061.
204: Eagye KJ, Nicolau DP, Kuti JL. Impact of superinfection on hospital length
of stay and costs in patients with ventilator-associated pneumonia. Semin Respir
Crit Care Med. 2009 Feb;30(1):116-23. Epub 2009 Feb 6. Review. PubMed PMID:
19199193
205: Anand N, Kollef MH. The alphabet soup of pneumonia: CAP, HAP, HCAP, NHAP,
and VAP. Semin Respir Crit Care Med. 2009 Feb;30(1):3-9. Epub 2009 Feb 6. Review.
PubMed PMID: 19199181.
206: Calder A, Owens CM. Imaging of parapneumonic pleural effusions and empyema
in children. Pediatr Radiol. 2009 Jun;39(6):527-37. Epub 2009 Feb 6. Review.
PubMed PMID: 19198826.
207: Tashiro M, Fukushima K, Hara A, Ehara N, Kakeya H, Saito A, Kohno S.
[Evaluation of the severity of community-acquired pneumonia based on the JRS and
IDSA/ATS guidelines]. Nihon Kokyuki Gakkai Zasshi. 2008 Dec;46(12):981-6.
Japanese. PubMed PMID: 19195197.
208: Oh D, Ahn YC, Park HC, Lim do H, Han Y. Prediction of radiation pneumonitis
following high-dose thoracic radiation therapy by 3 Gy/fraction for non-small
cell lung cancer: analysis of clinical and dosimetric factors. Jpn J Clin Oncol.
2009 Mar;39(3):151-7. Epub 2009 Feb 3. PubMed PMID: 19193653.
209: Yoshida M, Ishibashi K, Hida S, Yoshikawa N, Nakabayashi I, Akashi M,
Watanabe T, Tomiyasu T, Ohno N. Rapid decrease of anti-beta-glucan antibody as an
indicator for early diagnosis of carinii pneumonitis and deep mycotic infections
following immunosuppressive therapy in antineutrophil cytoplasmic
antibody-associated vasculitis. Clin Rheumatol. 2009 May;28(5):565-71. Epub 2009
Feb 4. PubMed PMID: 19190977.
210: Thomadaki H, Mavridis K, Talieri M, Scorilas A. Treatment of PC3 prostate
cancer cells with mitoxantrone, etoposide, doxorubicin and carboplatin induces
distinct alterations in the expression of kallikreins 5 and 11. Thromb Haemost.
2009 Feb;101(2):373-80. PubMed PMID: 19190824.
211: Chabot F, Gomez E, Guillaumot A, Kheir A, Chaouat A. [Acute exacerbations of
chronic obstructive pulmonary disease]. Presse Med. 2009 Mar;38(3):485-95. Epub
2009 Jan 29. French. PubMed PMID: 19185446.
212: Georgiou C, Inaba K, Teixeira PG, Hadjizacharia P, Chan LS, Brown C, Salim
A, Rhee P, Demetriades D. Cirrhosis and trauma are a lethal combination. World J
Surg. 2009 May;33(5):1087-92. PubMed PMID: 19184637.
213: Burzyantseva O, Dharmasena S, Jayawardena S, Rupanagudi VA, Krishnan P.
Hypercalcemia-leukocytosis syndrome in a patient with cavitating squamous cell
carcinoma of the lung. Cases J. 2009 Jan 31;2(1):108. PubMed PMID: 19183491;
PubMed Central PMCID: PMC2646690.
214: Wu HP, Chen CK, Chung K, Jiang BY, Yu TJ, Chuang DY. Plasma transforming
growth factor-beta1 level in patients with severe community-acquired pneumonia
and association with disease severity. J Formos Med Assoc. 2009 Jan;108(1):20-7.
PubMed PMID: 19181604.
215: Suda T, Kaida Y, Nakamura Y, Enomoto N, Fujisawa T, Imokawa S, Hashizume H,
Naito T, Hashimoto D, Takehara Y, Inui N, Nakamura H, Colby TV, Chida K. Acute
exacerbation of interstitial pneumonia associated with collagen vascular
diseases. Respir Med. 2009 Jun;103(6):846-53. Epub 2009 Feb 1. PubMed PMID:
19181509
216: Lima MS, Coletta EN, Ferreira RG, Jasinowodolinski D, Arakaki JS, Rodrigues
SC, Rocha NA, Pereira CA. Subacute and chronic hypersensitivity pneumonitis:
histopathological patterns and survival. Respir Med. 2009 Apr;103(4):508-15.
PubMed PMID: 19179061.
217: Babu P, Sharma R, Jayaseelan E, Appachu D. Berardinelli-Seip syndrome in a
6-year-old boy. Indian J Dermatol Venereol Leprol. 2008 Nov-Dec;74(6):644-6.
PubMed PMID: 19171993.
218: Mellouli F, Ouederni M, Dhouib N, Hajkacem MA, Slim A, Bejaoui M. Successful
treatment of influenza A virus by oseltamivir in bone marrow transplant
recipients. Pediatr Transplant. 2008 Dec 19. [Epub ahead of print] PubMed PMID:
19170930
219: Morgenthau AS, Padilla ML. Spectrum of fibrosing diffuse parenchymal lung
disease. Mt Sinai J Med. 2009 Feb;76(1):2-23. Review. PubMed PMID: 19170214.
220: Kligerman SJ, Groshong S, Brown KK, Lynch DA. Nonspecific interstitial
pneumonia: radiologic, clinical, and pathologic considerations. Radiographics.
2009 Jan-Feb;29(1):73-87. PubMed PMID: 19168837.
221: Tieleman AA, Knuijt S, van Vliet J, de Swart BJ, Ensink R, van Engelen BG.
Dysphagia is present but mild in myotonic dystrophy type 2. Neuromuscul Disord.
2009 Mar;19(3):196-8. Epub 2009 Jan 22. PubMed PMID: 19167224.
222: Tavil B, Kuskonmaz B, Kiper N, Cetin M, Gumruk F, Gurgey A. Pulmonary
thromboembolism in childhood: a single-center experience from Turkey. Heart Lung.
2009 Jan-Feb;38(1):56-65. Epub 2008 Aug 23. PubMed PMID: 19150531.
223: Abou Taam R, Jaubert F, Emond S, Le Bourgeois M, Epaud R, Karila C, Feldmann
D, Scheinmann P, de Blic J. Familial interstitial disease with I73T mutation: A
mid- and long-term study. Pediatr Pulmonol. 2009 Feb;44(2):167-75. PubMed PMID:
19148933
224: Kim HJ, Kim YJ, Seo MD, Yi HG, Lee SH, Lee SM, Kim DW, Yang SC, Lee CT, Lee
JS, Kim YW, Heo DS. Patterns of palliative procedures and clinical outcomes in
patients with advanced non-small cell lung cancer. Lung Cancer. 2009
Aug;65(2):242-6. Epub 2009 Jan 14. PubMed PMID: 19147252.
225: Aoki Y, Iwamoto M, Kamata Y, Nagashima T, Yoshio T, Okazaki H, Minota S.
Prognostic indicators related to death in patients with Pneumocystis pneumonia
associated with collagen vascular diseases. Rheumatol Int. 2009
Sep;29(11):1327-30. Epub 2009 Jan 14. PubMed PMID: 19142640.
226: Megraw M, Pereira F, Jensen ST, Ohler U, Hatzigeorgiou AG. A transcription
factor affinity-based code for mammalian transcription initiation. Genome Res.
2009 Apr;19(4):644-56. Epub 2009 Jan 13. PubMed PMID: 19141595; PubMed Central
PMCID: PMC2665783.
227: Yandiola PP, Capelastegui A, Quintana J, Diez R, Gorordo I, Bilbao A,
Zalacain R, Menendez R, Torres A. Prospective comparison of severity scores for
predicting clinically relevant outcomes for patients hospitalized with
community-acquired pneumonia. Chest. 2009 Jun;135(6):1572-9. Epub 2009 Jan 13.
PubMed PMID: 19141524.
228: Liapikou A, Ferrer M, Polverino E, Balasso V, Esperatti M, Piñer R, Mensa J,
Luque N, Ewig S, Menendez R, Niederman MS, Torres A. Severe community-acquired
pneumonia: validation of the Infectious Diseases Society of America/American
Thoracic Society guidelines to predict an intensive care unit admission. Clin
Infect Dis. 2009 Feb 15;48(4):377-85. PubMed PMID: 19140759.
229: Mandell LA. Severe community-acquired pneumonia (CAP) and the Infectious
Diseases Society of America/American Thoracic Society CAP guidelines prediction
rule: validated or not. Clin Infect Dis. 2009 Feb 15;48(4):386-8. PubMed PMID:
19140757
230: Montero M, Domínguez M, Orozco-Levi M, Salvadó M, Knobel H. Mortality of
COPD patients infected with multi-resistant Pseudomonas aeruginosa: a case and
control study. Infection. 2009 Feb;37(1):16-9. Epub 2008 Dec 5. PubMed PMID:
19139809
231: Schauer JM, Engle LL, Maugher DT, Cherry RA. Does acuity matter?--Optimal
timing of tracheostomy stratified by injury severity. J Trauma. 2009
Jan;66(1):220-5. PubMed PMID: 19131830.
232: Cotton BA, Au BK, Nunez TC, Gunter OL, Robertson AM, Young PP. Predefined
massive transfusion protocols are associated with a reduction in organ failure
and postinjury complications. J Trauma. 2009 Jan;66(1):41-8; discussion 48-9.
PubMed PMID: 19131804.
233: Chalmers JD, Singanayagam A, Murray MP, Scally C, Fawzi A, Hill AT. Risk
factors for complicated parapneumonic effusion and empyema on presentation to
hospital with community-acquired pneumonia. Thorax. 2009 Jul;64(7):592-7. Epub
2009 Jan 8. PubMed PMID: 19131449.
234: Menéndez R, Martínez R, Reyes S, Mensa J, Filella X, Marcos MA, Martínez A,
Esquinas C, Ramirez P, Torres A. Biomarkers improve mortality prediction by
prognostic scales in community-acquired pneumonia. Thorax. 2009 Jul;64(7):587-91.
Epub 2009 Jan 8. PubMed PMID: 19131448.
235: Phillips L, Hassanzadeh S, Kosaner J, Martin J, Deibl M, Anderson I.
Comparing auditory perception and speech production outcomes: non-language
specific assessment of auditory perception and speech production in children with
cochlear implants. Cochlear Implants Int. 2009 Jun;10(2):92-102. PubMed PMID:
19127550
236: Volpato S, Cavalieri M, Guerra G, Sioulis F, Ranzini M, Maraldi C, Fellin R,
Guralnik JM. Performance-based functional assessment in older hospitalized
patients: feasibility and clinical correlates. J Gerontol A Biol Sci Med Sci.
2008 Dec;63(12):1393-8. PubMed PMID: 19126854.
237: Besselink MG, van Santvoort HC, Boermeester MA, Nieuwenhuijs VB, van Goor H,
Dejong CH, Schaapherder AF, Gooszen HG; Dutch Acute Pancreatitis Study Group.
Timing and impact of infections in acute pancreatitis. Br J Surg. 2009
Mar;96(3):267-73. PubMed PMID: 19125434.
238: Rello J. Demographics, guidelines, and clinical experience in severe
community-acquired pneumonia. Crit Care. 2008;12 Suppl 6:S2. Review. PubMed PMID:
19105795; PubMed Central PMCID: PMC2607112.
239: Kim MS, Cho YJ, Moon HB, Cho SH. Factors for poor prognosis of near-fatal
asthma after recovery from a life-threatening asthma attack. Korean J Intern Med.
2008 Dec;23(4):170-5. PubMed PMID: 19119253; PubMed Central PMCID: PMC2687680.
240: Lim ECW, Liu J, Yeung MT, Wong WP. After-hour physiotherapy services in a
tertiary general hospital. Physiother Theory Pract. 2008 Nov-Dec;24(6):423-9.
PubMed PMID: 19117233.
241: Scriabine A, Rabin DU. New developments in the therapy of pulmonary
fibrosis. Adv Pharmacol. 2009;57:419-64. Epub 2009 Nov 27. PubMed PMID: 20230768.
242: Rello J, Rodriguez A, Lisboa T, Gallego M, Lujan M, Wunderink R. PIRO score
for community-acquired pneumonia: a new prediction rule for assessment of
severity in intensive care unit patients with community-acquired pneumonia. Crit
Care Med. 2009 Feb;37(2):456-62. PubMed PMID: 19114916.
243: Schnitzbauer AA, Tsui TY, Kirchner G, Scherer MN, Bein T, Schlitt HJ, Obed
A. Liver transplantation for sclerosing cholangitis in a polytraumatized patient.
Nat Clin Pract Gastroenterol Hepatol. 2009 Feb;6(2):121-6. Epub 2008 Dec 23.
PubMed PMID: 19107104.
244: Carmier D, Marchand-Adam S, Diot P, Diot E. [Respiratory involvement in
systemic lupus erythematosus]. Rev Mal Respir. 2008 Dec;25(10):1289-303. Review.
French. PubMed PMID: 19107019.
245: Nagaraj VH, O'Flanagan RA, Sengupta AM. Better estimation of protein-DNA
interaction parameters improve prediction of functional sites. BMC Biotechnol.
2008 Dec 23;8:94. PubMed PMID: 19105805; PubMed Central PMCID: PMC2654563.
246: Zamudio JR, Mittra B, Chattopadhyay A, Wohlschlegel JA, Sturm NR, Campbell
DA. Trypanosoma brucei spliced leader RNA maturation by the cap 1 2'-O-ribose
methyltransferase and SLA1 H/ACA snoRNA pseudouridine synthase complex. Mol Cell
Biol. 2009 Mar;29(5):1202-11. Epub 2008 Dec 22. PubMed PMID: 19103757; PubMed
Central PMCID: PMC2643836.
247: Kudo M, Kanai N, Hirasawa T, Asao T, Kuwano H. Prognostic significance of
intragastric pressure for the occurrence of aspiration pneumonia in the patients
with percutaneous endoscopic gastrostomy (PEG). Hepatogastroenterology. 2008
Sep-Oct;55(86-87):1935-8. PubMed PMID: 19102426.
248: Wang W, Shen KL, Zeng JJ. [Clinical studies of children with bronchiolitis
obliterans]. Zhonghua Er Ke Za Zhi. 2008 Oct;46(10):732-8. Chinese. PubMed PMID:
19099876
249: Nishida K, Palalay MP. Prognostic factors and utility of scoring systems in
patients with hematological malignancies admitted to the intensive care unit and
required a mechanical ventilator. Hawaii Med J. 2008 Oct;67(10):264-9. PubMed
PMID: 19097551.
250: Avnon LS, Pikovsky O, Sion-Vardy N, Almog Y. Acute interstitial
pneumonia-Hamman-Rich syndrome: clinical characteristics and diagnostic and
therapeutic considerations. Anesth Analg. 2009 Jan;108(1):232-7. PubMed PMID:
19095855
251: Jackson JD, Weis DC, Visco DP Jr. Potential glucocorticoid receptor ligands
with pulmonary selectivity using I-QSAR with the signature molecular descriptor.
Chem Biol Drug Des. 2008 Dec;72(6):540-50. PubMed PMID: 19090921.
252: Ahmed N. Acute acalculous cholecystitis complicating major trauma: a report
of five cases. South Med J. 2008 Nov;101(11):1146-9. Review. PubMed PMID:
19088526
253: Chong CP, Street PR. Pneumonia in the elderly: a review of severity
assessment, prognosis, mortality, prevention, and treatment. South Med J. 2008
Nov;101(11):1134-40; quiz 1132, 1179. Review. PubMed PMID: 19088524.
254: Jin ZC, Yu ZX, Ji MS, Zhou H. [Application of continuous veno-venous
hemofiltration in patients with acute respiratory distress syndrome]. Zhonghua Yi
Xue Za Zhi. 2008 Aug 19;88(32):2274-7. Chinese. PubMed PMID: 19087678.
255: Khatod M, Inacio M, Paxton EW, Bini SA, Namba RS, Burchette RJ, Fithian DC.
Knee replacement: epidemiology, outcomes, and trends in Southern California:
17,080 replacements from 1995 through 2004. Acta Orthop. 2008 Dec;79(6):812-9.
PubMed PMID: 19085500.
256: Centers for Disease Control and Prevention (CDC). Update: influenza
activity--United States, September 28-November 29, 2008. MMWR Morb Mortal Wkly
Rep. 2008 Dec 12;57(49):1329-32. PubMed PMID: 19078922.
257: Giamarellos-Bourboulis EJ, Mouktaroudi M, Tsaganos T, Koutoukas P, Spyridaki
E, Pelekanou A, Kotzampassi K. Evidence for the participation of soluble
triggering receptor expressed on myeloid cells-1 in the systemic inflammatory
response syndrome after multiple trauma. J Trauma. 2008 Dec;65(6):1385-90. PubMed
PMID: 19077631.
258: Swanson JM, Wood GC, Croce MA, Mueller EW, Boucher BA, Fabian TC. Utility of
preliminary bronchoalveolar lavage results in suspected ventilator-associated
pneumonia. J Trauma. 2008 Dec;65(6):1271-7. PubMed PMID: 19077612.
259: Chisti MJ, Huq S, Das SK, Malek MA, Ahmed T, Faruque AS, Salam MA.
Predictors of severe illness in children under age five with concomitant
infection with pneumonia and diarrhea at a large hospital in Dhaka, Bangladesh.
Southeast Asian J Trop Med Public Health. 2008 Jul;39(4):719-27. PubMed PMID:
19058611
260: Beaulieu M, Williamson D, Sirois C, Lachaine J. Do proton-pump inhibitors
increase the risk for nosocomial pneumonia in a medical intensive care unit? J
Crit Care. 2008 Dec;23(4):513-8. PubMed PMID: 19056015.
261: Kobashi Y, Mouri K, Yagi S, Obase Y, Oka M. Clinical analysis of cases of
empyema due to Streptococcus milleri group. Jpn J Infect Dis. 2008
Nov;61(6):484-6. PubMed PMID: 19050362.
262: Hong KS, Kang DW, Koo JS, Yu KH, Han MK, Cho YJ, Park JM, Bae HJ, Lee BC.
Impact of neurological and medical complications on 3-month outcomes in acute
ischaemic stroke. Eur J Neurol. 2008 Dec;15(12):1324-31. PubMed PMID: 19049549.
263: Dimov AS, Volkova OA, Maksimov NI. [Clinico-organizational and certain
deontological aspects (defects) of medical care for patients with severe
community-acquired pneumonia]. Klin Med (Mosk). 2008;86(9):39-42. Russian. PubMed
PMID: 19048836.
264: Nakamura S, Yanagihara K, Izumikawa K, Seki M, Kakeya H, Yamamoto Y, Mukae
H, Tashiro T, Kohno S. [Efficacy of sivelestat for acute lung injury due to
severe bacterial pneumonia with systemic inflammatory response syndrome]. Nihon
Kokyuki Gakkai Zasshi. 2008 Oct;46(10):793-7. Japanese. PubMed PMID: 19044028.
265: Chen B, Li HP, Zhang RX, Yi XH, Shi JY, Shao J. [Idiopathic lymphoid
interstitial pneumonia: a report of 3 cases and literature review]. Zhonghua Nei
Ke Za Zhi. 2008 Jun;47(6):486-90. Review. Chinese. PubMed PMID: 19040067.
266: Yan SM, Zhao Y, Zeng XF, Zhang FC, Dong Y. [Lung involvement of primary
Sjögren's syndrome]. Zhonghua Jie He He Hu Xi Za Zhi. 2008 Jul;31(7):513-6.
Chinese. PubMed PMID: 19035231.
267: Bharti B, Kaur L, Bharti S. Role of chest X-ray in predicting outcome of
acute severe pneumonia. Indian Pediatr. 2008 Nov;45(11):893-8. PubMed PMID:
19029561
268: Aujesky D, Fine MJ. Community-acquired pneumonia: treatment at home or in
the hospital? Am J Med. 2008 Dec;121(12):1038-40. PubMed PMID: 19028194.
269: Maranhão-Filho P, Campos JC, Lima MA. Intracranial meningiomas in children:
ten-year experience. Pediatr Neurol. 2008 Dec;39(6):415-7. PubMed PMID: 19027587.
270: Nantanda R, Hildenwall H, Peterson S, Kaddu-Mulindwa D, Kalyesubula I,
Tumwine JK. Bacterial aetiology and outcome in children with severe pneumonia in
Uganda. Ann Trop Paediatr. 2008 Dec;28(4):253-60. PubMed PMID: 19021940.
271: Hompland T, Erikson A, Lindgren M, Lindmo T, de Lange Davies C.
Second-harmonic generation in collagen as a potential cancer diagnostic
parameter. J Biomed Opt. 2008 Sep-Oct;13(5):054050. PubMed PMID: 19021430.
272: Franssen FM, O'Donnell DE, Goossens GH, Blaak EE, Schols AM. Obesity and the
lung: 5. Obesity and COPD. Thorax. 2008 Dec;63(12):1110-7. Review. PubMed PMID:
19020276
273: Smith Hammond CA, Goldstein LB, Horner RD, Ying J, Gray L, Gonzalez-Rothi L,
Bolser DC. Predicting aspiration in patients with ischemic stroke: comparison of
clinical signs and aerodynamic measures of voluntary cough. Chest. 2009
Mar;135(3):769-77. Epub 2008 Nov 18. PubMed PMID: 19017886.
274: Johnstone J, Eurich DT, Majumdar SR, Jin Y, Marrie TJ. Long-term morbidity
and mortality after hospitalization with community-acquired pneumonia: a
population-based cohort study. Medicine (Baltimore). 2008 Nov;87(6):329-34.
PubMed PMID: 19011504.
275: Aujesky D, Fine MJ. The pneumonia severity index: a decade after the initial
derivation and validation. Clin Infect Dis. 2008 Dec 1;47 Suppl 3:S133-9. Review.
PubMed PMID: 18986279.
276: Rabell-Santacana V, Pastor-Ramon E, Pujol-Ribó J, Solà-Genovés J, Díaz-Egea
M, Layola-Brias M, Fernández-Campi MD. [Inhaled drug use in elderly patients and
limitations in association with geriatric assessment scores]. Arch Bronconeumol.
2008 Oct;44(10):519-24. Spanish. PubMed PMID: 19006631.
277: Aydogdu M, Gursel G. Predictive factors for septic shock in patients with
ventilator-associated pneumonia. South Med J. 2008 Dec;101(12):1222-6. PubMed
PMID: 19005450.
278: Zhao L, Guan XD, Cheng YZ. [The influence of glutamine-enriched total
parenteral nutrition on morbidity rate of lung infection in patients with severe
craniocerebral injury]. Zhongguo Wei Zhong Bing Ji Jiu Yi Xue. 2008
Nov;20(11):695-6. Chinese. PubMed PMID: 19000435.
279: Chalmers JD, Singanayagam A, Hill AT. Predicting the need for mechanical
ventilation and/or inotropic support for young adults admitted to the hospital
with community-acquired pneumonia. Clin Infect Dis. 2008 Dec 15;47(12):1571-4.
PubMed PMID: 18991510.
280: Wasir H, Mehta Y, Pawar M, Choudhary A, Kohli V, Meharwal ZS, Bapna RK,
Malhotra R, Trehan N. Predictors of operative mortality following primary
coronary artery bypass surgery. Indian Heart J. 2006 Mar-Apr;58(2):144-8. PubMed
PMID: 18989059.
281: Craven DE, Hjalmarson K. Prophylaxis of ventilator-associated pneumonia:
changing culture and strategies to trump disease. Chest. 2008 Nov;134(5):898-900.
PubMed PMID: 18988773.
282: Ferguson NM, Lévy M, Ramos-Vara JA, Baird DK, Wu CC. Hypertrophic osteopathy
associated with mycotic pneumonia in two juvenile elk (Cervus elaphus). J Vet
Diagn Invest. 2008 Nov;20(6):849-53. PubMed PMID: 18987246.
283: Himsworth CG, Malek S, Saville K, Allen AL. Endogenous lipid pneumonia and
what lies beneath. Can Vet J. 2008 Aug;49(8):813-5. PubMed PMID: 18978980; PubMed
Central PMCID: PMC2465793.
284: Orlikowski D, Terzi N, Blumen M, Sharshar T, Raphael JC, Annane D, Lofaso F.
Tongue weakness is associated with respiratory failure in patients with severe
Guillain-Barré syndrome. Acta Neurol Scand. 2009 Jun;119(6):364-70. Epub 2008 Oct
22. PubMed PMID: 18976323.
285: Cheng AC, Black JF, Buising KL. Respiratory rate: the neglected vital sign.
Med J Aust. 2008 Nov 3;189(9):531. PubMed PMID: 18976205.
286: Luo RQ, Lei YX, Zhang X, Liang F. [Clinical analysis of patients with
systemic lupus erythematosus and concomitant pulmonary hypertension]. Nan Fang Yi
Ke Da Xue Xue Bao. 2008 Oct;28(10):1860-3. Chinese. PubMed PMID: 18971190.
287: Chalmers JD, Singanayagam A, Murray MP, Hill AT. Prior statin use is
associated with improved outcomes in community-acquired pneumonia. Am J Med. 2008
Nov;121(11):1002-1007.e1. PubMed PMID: 18954848.
288: Polgreen PM, Chen Y, Pennock DM, Nelson FD. Using internet searches for
influenza surveillance. Clin Infect Dis. 2008 Dec 1;47(11):1443-8. PubMed PMID:
18954267
289: Kanerva M, Ollgren J, Virtanen MJ, Lyytikäinen O; Prevalence Survey Study
Group. Risk factors for death in a cohort of patients with and without
healthcare-associated infections in Finnish acute care hospitals. J Hosp Infect.
2008 Dec;70(4):353-60. Epub 2008 Oct 31. PubMed PMID: 18951660.
290: Ishiwada N, Kurosaki T, Terashima I, Kohno Y. The incidence of pediatric
invasive pneumococcal disease in Chiba prefecture, Japan (2003-2005). J Infect.
2008 Dec;57(6):455-8. Epub 2008 Oct 21. PubMed PMID: 18945492.
291: Kenzaki K, Sakiyama S, Toba H, Nakagawa Y, Takizawa H, Kondo K, Tangoku A.
[Clinical analysis of tracheoplasty and bronchoplasty in primary lung cancer].
Kyobu Geka. 2008 Oct;61(11):951-6. Japanese. PubMed PMID: 18939431.
292: Cabrera-Cordero JA, Adefna-Pérez RI, Leal-Mursulí A, Castellanos-González
JA, Izquierdo-Lara FT, Cabrera-Alfonso S. [Pneumothorax in human immunodeficiency
virus infected patients]. Cir Esp. 2008 Oct;84(4):221-5. Spanish. PubMed PMID:
18928773
293: Sardana G, Dowell B, Diamandis EP. Emerging biomarkers for the diagnosis and
prognosis of prostate cancer. Clin Chem. 2008 Dec;54(12):1951-60. Epub 2008 Oct
16. Review. PubMed PMID: 18927246.
294: Webster D, Chui L, Tyrrell GJ, Marrie TJ. Health care-associated
Staphylococcus aureus pneumonia. Can J Infect Dis Med Microbiol. 2007
May;18(3):181-8. PubMed PMID: 18923721; PubMed Central PMCID: PMC2533551.
295: Chalmers JD, Hill AT. A powerful new severity score for community-acquired
pneumonia but will anyone use it? Clin Infect Dis. 2008 Nov 15;47(10):1363;
author reply 1364. PubMed PMID: 18922077.
296: Domagała-Kulawik J. BAL in the diagnosis of smoking-related interstitial
lung diseases: review of literature and analysis of our experience. Diagn
Cytopathol. 2008 Dec;36(12):909-15. Review. PubMed PMID: 18855907.
297: Smith B, Kemp M, Ethelberg S, Schiellerup P, Bruun BG, Gerner-Smidt P,
Christensen JJ. Listeria monocytogenes: maternal-foetal infections in Denmark
1994-2005. Scand J Infect Dis. 2009;41(1):21-5. PubMed PMID: 18855227.
298: Ross S, Villadolid D, Al-Saadi S, Boyle R, Cowgill SM, Rosemurgy A. After
laparoscopic Heller myotomy, do emergency department visits or readmissions
predict poor long-term outcomes? J Gastrointest Surg. 2008 Dec;12(12):2125-32.
Epub 2008 Oct 15. PubMed PMID: 18854961.
299: Kerwin AJ, Griffen MM, Tepas JJ 3rd, Schinco MA, Devin T, Frykberg ER. Best
practice determination of timing of spinal fracture fixation as defined by
analysis of the National Trauma Data Bank. J Trauma. 2008 Oct;65(4):824-30;
discussion 830-1. PubMed PMID: 18849798.
300: Weinberg JA, McGwin G Jr, Marques MB, Cherry SA 3rd, Reiff DA, Kerby JD, Rue
LW 3rd. Transfusions in the less severely injured: does age of transfused blood
affect outcomes? J Trauma. 2008 Oct;65(4):794-8. PubMed PMID: 18849793.
301: Hemmila MR, Taddonio MA, Arbabi S, Maggio PM, Wahl WL. Intensive insulin
therapy is associated with reduced infectious complications in burn patients.
Surgery. 2008 Oct;144(4):629-35; discussion 635-7. Epub 2008 Aug 29. PubMed PMID:
18847648
302: Zhang ZY, Jiang JJ, Zhou JY. [Thoracic involvement of Castleman's disease:
report of 10 cases]. Zhonghua Jie He He Hu Xi Za Zhi. 2008 Apr;31(4):268-71.
Chinese. PubMed PMID: 18846963.
303: Shi JH, Xu WB, Liu HR, Tian XL, Feng RE, Xu ZJ, Zhu YJ.
[Clinico-pathological manifestations in interstitial lung diseases associated
with polymyositis-dermatomyositis]. Zhonghua Jie He He Hu Xi Za Zhi. 2008
Apr;31(4):250-4. Chinese. PubMed PMID: 18846959.
304: Strålin K, Goscinski G, Hedlund J, Lidman C, Spindler C, Ortqvist A,
Holmberg H. [Management of adult patients with community-acquired pneumonia.
Evidence-based guidelines from the Swedish Infectious Diseases Association].
Lakartidningen. 2008 Sep 17-23;105(38):2582-7. Swedish. PubMed PMID: 18846863.
305: Li J, Duan MH, Han B, Zhang W, Zhou DB, Zhao YQ, Shen T. [Dendritic cell
sarcoma: 4 cases report with literature review]. Zhonghua Xue Ye Xue Za Zhi. 2008
Apr;29(4):263-6. Review. Chinese. PubMed PMID: 18843982.
306: Oliveira NS, Silva VR, Castelo JS, Elias-Neto J, Pereira FE, Carvalho WB.
Serum level of cardiac troponin I in pediatric patients with sepsis or septic
shock. Pediatr Crit Care Med. 2008 Jul;9(4):414-7. PubMed PMID: 18843251.
307: Macgowan AP; BSAC Working Parties on Resistance Surveillance. Clinical
implications of antimicrobial resistance for therapy. J Antimicrob Chemother.
2008 Nov;62 Suppl 2:ii105-14. Review. PubMed PMID: 18819975.
308: Madjid M. Acute infections, vaccination and prevention of cardiovascular
disease. CMAJ. 2008 Oct 7;179(8):749-50. PubMed PMID: 18838444; PubMed Central
PMCID: PMC2553865.
309: Steinmetz MO, Akhmanova A. Capturing protein tails by CAP-Gly domains.
Trends Biochem Sci. 2008 Nov;33(11):535-45. Epub 2008 Oct 4. Review. PubMed PMID:
18835717
310: Finelli L, Fiore A, Dhara R, Brammer L, Shay DK, Kamimoto L, Fry A, Hageman
J, Gorwitz R, Bresee J, Uyeki T. Influenza-associated pediatric mortality in the
United States: increase of Staphylococcus aureus coinfection. Pediatrics. 2008
Oct;122(4):805-11. PubMed PMID: 18829805.
311: Aly H, Badawy M, El-Kholy A, Nabil R, Mohamed A. Randomized, controlled
trial on tracheal colonization of ventilated infants: can gravity prevent
ventilator-associated pneumonia? Pediatrics. 2008 Oct;122(4):770-4. PubMed PMID:
18829800
312: Park IN, Jegal Y, Kim DS, Do KH, Yoo B, Shim TS, Lim CM, Lee SD, Koh Y, Kim
WS, Kim WD, Jang SJ, Kitaichi M, Nicholson AG, Colby TV. Clinical course and lung
function change of idiopathic nonspecific interstitial pneumonia. Eur Respir J.
2009 Jan;33(1):68-76. Epub 2008 Oct 1. PubMed PMID: 18829672.
313: Geiser T. Single gene expression as a prognostic marker in idiopathic
interstitial pneumonia? Respiration. 2008;76(3):251-2. Epub 2008 Sep 25. PubMed
PMID: 18824885.
314: Capelastegui A, España PP, Quintana JM, Gallarreta M, Gorordo I, Esteban C,
Urrutia I, Bilbao A. Declining length of hospital stay for pneumonia and
postdischarge outcomes. Am J Med. 2008 Oct;121(10):845-52. PubMed PMID: 18823851.
315: Craven DE, Chroneou A, Zias N, Hjalmarson KI. Ventilator-associated
tracheobronchitis: the impact of targeted antibiotic therapy on patient outcomes.
Chest. 2009 Feb;135(2):521-8. Epub 2008 Sep 23. Review. PubMed PMID: 18812452.
316: Ingram PR, Cerbe L, Hassell M, Wilson M, Dyer JR. Limited role for
outpatient parenteral antibiotic therapy for community-acquired pneumonia.
Respirology. 2008 Nov;13(6):893-6. PubMed PMID: 18811888.
317: Mochimaru H, Kawamoto M, Enomoto T, Saitoh Y, Abe S, Nei T, Fukuda Y, Kudoh
S. Transbronchial biopsy is clinically useful in classifying patients with
interstitial pneumonia associated with polymyositis and dermatomyositis.
Respirology. 2008 Nov;13(6):863-70. PubMed PMID: 18811885.
318: Dimov AS, Volkova OA. [Pneumonia as a general medical problem]. Ter Arkh.
2008;80(8):89-92. Review. Russian. PubMed PMID: 18807551.
319: Gessner BD, Adegbola RA. The impact of vaccines on pneumonia: key lessons
from Haemophilus influenzae type b conjugate vaccines. Vaccine. 2008 Jun 16;26
Suppl 2:B3-8. Review. PubMed PMID: 18793604.
320: Grigorakos L, Sotiriou E, Koulendi D, Michail A, Alevizou S, Evagelopoulou
P, Karatzas S, Ligidakis N. Preoperative pulmonary evaluation (PPE) as a
prognostic factor in patients undergoing upper abdominal surgery.
Hepatogastroenterology. 2008 Jul-Aug;55(85):1229-32. PubMed PMID: 18795662.
321: Behr J, Furst DE. Pulmonary function tests. Rheumatology (Oxford). 2008
Oct;47 Suppl 5:v65-7. Review. PubMed PMID: 18784151.
322: Igarashi H, Ito T, Kawabe K, Hisano T, Arita Y, Kaku T, Takayanagi R.
Chemoradiotherapy with twice-weekly administration of low-dose gemcitabine for
locally advanced pancreatic cancer. World J Gastroenterol. 2008 Sep
14;14(34):5311-5. PubMed PMID: 18785284; PubMed Central PMCID: PMC2744062.
323: Giannoudis PV, Harwood PJ, Loughenbury P, Van Griensven M, Krettek C, Pape
HC. Correlation between IL-6 levels and the systemic inflammatory response score:
can an IL-6 cutoff predict a SIRS state? J Trauma. 2008 Sep;65(3):646-52. PubMed
PMID: 18784579.
324: Figueiredo S, Paula Vaz A, Bento J, Dolores Pinheiro M, Amorim A, Damas C.
Streptococcus pneumoniae - caused CAP in hospitalised patients: mortality
predictors. Rev Port Pneumol. 2008 Sep-Oct;14(5):601-15. English, Portuguese.
PubMed PMID: 18781262.
325: Strassburg A, Rupp J, Herth FJ, Magnussen H, Zabel P, Lange C. [Infection
diagnostics in pneumology. Part 1. Survey and methods]. Pneumologie. 2008
Dec;62(12):730-43. Epub 2008 Sep 5. Review. German. PubMed PMID: 18777468.
326: Riquelme O R, Riquelme O M, Rioseco Z ML, Gómez M V, Cárdenas G, Torres C.
[Community-acquired pneumonia in the elderly: clinical and nutritional aspects].
Rev Med Chil. 2008 May;136(5):587-93. Epub 2008 Jul 30. Spanish. PubMed PMID:
18769805
327: Mahadevan S, Shah SL, Marrie TJ, Slupsky CM. Analysis of metabolomic data
using support vector machines. Anal Chem. 2008 Oct 1;80(19):7562-70. Epub 2008
Sep 4. PubMed PMID: 18767870.
328: Woisard V, Victor G. [Importance of swallowing scintigraphy in the
evaluation of the risk of pulmonary complications in patients with a swallowing
disorder]. Rev Laryngol Otol Rhinol (Bord). 2008;129(2):91-5. French. PubMed
PMID: 18767326.
329: Palgrave KA, Palgrave CJ, Rhoads WS, Voges AK. What is your diagnosis?
Interstitial pneumonia. J Am Vet Med Assoc. 2008 Sep 1;233(5):711-2. PubMed PMID:
18764702
330: Pauls S, Krüger S, Muche R, Klemen D, Billich C, Gerstner S, Schmidt SA,
Hombach V, Brambs HJ. Assessment of pneumonia severity: multidetector-row CT in
comparison to clinical score CRB-65. Clin Imaging. 2008 Sep-Oct;32(5):342-5.
PubMed PMID: 18760720.
331: Moran GJ, Barrett TW, Mower WR, Krishnadasan A, Abrahamian FM, Ong S, Nakase
JY, Pinner RW, Kuehnert MJ, Jarvis WR, Talan DA; EMERGEncy ID NET Study Group.
Decision instrument for the isolation of pneumonia patients with suspected
pulmonary tuberculosis admitted through US emergency departments. Ann Emerg Med.
2009 May;53(5):625-32. Epub 2008 Aug 29. PubMed PMID: 18760503.
332: Bochicchio GV, Napolitano L, Joshi M, Bochicchio K, Shih D, Meyer W, Scalea
TM. Blood product transfusion and ventilator-associated pneumonia in trauma
patients. Surg Infect (Larchmt). 2008 Aug;9(4):415-22. PubMed PMID: 18759678.
333: Salluh JI, Bozza FA, Soares M, Verdeal JC, Castro-Faria-Neto HC, Lapa E
Silva JR, Bozza PT. Adrenal response in severe community-acquired pneumonia:
impact on outcomes and disease severity. Chest. 2008 Nov;134(5):947-54. Epub 2008
Aug 27. PubMed PMID: 18753464.
334: de Carvalho EF, Parra ER, de Souza R, A'b Saber AM, Machado Jde C, Capelozzi
VL. Arterial and interstitial remodelling processes in non-specific interstitial
pneumonia: systemic sclerosis versus idiopathic. Histopathology. 2008
Aug;53(2):195-204. PubMed PMID: 18752502.
335: Wilson TN, Tew K, Taranath A. Multiple mycotic aneurysms of the pulmonary
arteries resolving with conservative management: multislice CT examination
findings. J Thorac Imaging. 2008 Aug;23(3):197-201. PubMed PMID: 18728549.
336: Gieteling MJ, Bierma-Zeinstra SM, Passchier J, Berger MY. Prognosis of
chronic or recurrent abdominal pain in children. J Pediatr Gastroenterol Nutr.
2008 Sep;47(3):316-26. PubMed PMID: 18728528.
337: Lee HY, Hwang B, Lee PC, Jan SL, Meng CC. Congenital atresia of unilateral
pulmonary veins associated with a single ventricle: a rare case report and
literature review. Circ J. 2008 Sep;72(9):1544-6. Review. PubMed PMID: 18724038.
338: Cheng AC, Buising KL. Delayed administration of antibiotics and mortality in
patients with community-acquired pneumonia. Ann Emerg Med. 2009 May;53(5):618-24.
Epub 2008 Aug 23. PubMed PMID: 18723255.
339: Dossett LA, Heffernan D, Lightfoot M, Collier B, Diaz JJ, Sawyer RG, May AK.
Obesity and pulmonary complications in critically injured adults. Chest. 2008
Nov;134(5):974-80. Epub 2008 Aug 21. PubMed PMID: 18719063; PubMed Central PMCID:
PMC2654260.
340: Hayhurst KP, Drake RJ, Lewis SW. Patient factors associated with receipt of
combination antipsychotic drug therapy in the treatment of schizophrenia. J
Psychopharmacol. 2010 Jan;24(1):83-9. Epub 2008 Aug 21. PubMed PMID: 18719041.
341: Gasior G, Pierzchała W, Ograbek-Król M. [The relationship between cigarette
smoking and some types of idiopathic interstitial pneumonias]. Wiad Lek.
2008;61(1-3):48-52. Review. Polish. PubMed PMID: 18717043.
342: Tokunaga T, Kubo T, Ryan S, Tomizawa M, Yoshida S, Takagi K, Furui K, Gotoh
T. Long-term outcome after placement of a percutaneous endoscopic gastrostomy
tube. Geriatr Gerontol Int. 2008 Mar;8(1):19-23. PubMed PMID: 18713185.
343: Shindo Y, Sato S, Maruyama E, Ohashi T, Ogawa M, Imaizumi K, Hasegawa Y.
Comparison of severity scoring systems A-DROP and CURB-65 for community-acquired
pneumonia. Respirology. 2008 Sep;13(5):731-5. PubMed PMID: 18713094.
344: Newman EJ, Grosset DG, Kennedy PG. The parkinsonism-hyperpyrexia syndrome.
Neurocrit Care. 2009;10(1):136-40. Epub 2008 Aug 20. Review. PubMed PMID:
18712508
345: Papadomichelakis E, Kontopidou F, Antoniadou A, Poulakou G, Koratzanis E,
Kopterides P, Mavrou I, Armaganidis A, Giamarellou H. Screening for resistant
gram-negative microorganisms to guide empiric therapy of subsequent infection.
Intensive Care Med. 2008 Dec;34(12):2169-75. Epub 2008 Aug 19. PubMed PMID:
18712349
346: Sudharshan S, Biswas J. Introduction and immunopathogenesis of acquired
immune deficiency syndrome. Indian J Ophthalmol. 2008 Sep-Oct;56(5):357-62.
Review. PubMed PMID: 18711263; PubMed Central PMCID: PMC2636143.
347: Katzenstein AL, Mukhopadhyay S, Myers JL. Diagnosis of usual interstitial
pneumonia and distinction from other fibrosing interstitial lung diseases. Hum
Pathol. 2008 Sep;39(9):1275-94. Review. PubMed PMID: 18706349.
348: Morikawa N, Kuroda T, Honna T, Kitano Y, Takayasu H, Ito Y, Nakamura T,
Nakagawa S, Hayashi S, Sago H. The impact of strict infection control on survival
rate of prenatally diagnosed isolated congenital diaphragmatic hernia. Pediatr
Surg Int. 2008 Oct;24(10):1105-9. PubMed PMID: 18704453.
349: Brinar VV, Poser CM. Disseminated encephalomyelitis in adults. Clin Neurol
Neurosurg. 2008 Nov;110(9):913-8. Epub 2008 Aug 13. PubMed PMID: 18703274.
350: Ayabe E, Kaneko N, Ohkuni Y, Misawa M, Inoue K, Tanabe Y, Yasui D, Sato C,
Mitsuishi Y, Nakashita T, Motojima S. [The efficacy of influenza vaccine for
acute exacerbation of chronic obstructive lung disease in elderly patients].
Nihon Kokyuki Gakkai Zasshi. 2008 Jul;46(7):511-5. Japanese. PubMed PMID:
18700566
351: Orozco CV, Velásquez LH, Méndez NH, Augusto B, Salazar T. [Hyper IgE
syndrome. Opportune diagnosis and management]. Rev Alerg Mex. 2008
Jan-Feb;55(1):38-45. Review. Spanish. PubMed PMID: 18697452.
352: Economopoulou A, Dominguez M, Helynck B, Sissoko D, Wichmann O, Quenel P,
Germonneau P, Quatresous I. Atypical Chikungunya virus infections: clinical
manifestations, mortality and risk factors for severe disease during the
2005-2006 outbreak on Réunion. Epidemiol Infect. 2009 Apr;137(4):534-41. Epub
2008 Aug 11. PubMed PMID: 18694529.
353: Boussekey N, Van Grunderbeeck N, Leroy O. CRP: a new prognosis marker in
community-acquired pneumonia? Am J Med. 2008 Aug;121(8):e21; author reply e23.
PubMed PMID: 18691466.
354: Miyazaki Y, Tateishi T, Akashi T, Ohtani Y, Inase N, Yoshizawa Y. Clinical
predictors and histologic appearance of acute exacerbations in chronic
hypersensitivity pneumonitis. Chest. 2008 Dec;134(6):1265-70. Epub 2008 Aug 8.
PubMed PMID: 18689595.
355: Lisboa T, Blot S, Waterer GW, Canalis E, de Mendoza D, Rodriguez A, Rello J;
Community-Acquired Pneumonia Intensive Care Units Study Investigators. Radiologic
progression of pulmonary infiltrates predicts a worse prognosis in severe
community-acquired pneumonia than bacteremia. Chest. 2009 Jan;135(1):165-72. Epub
2008 Aug 8. PubMed PMID: 18689575.
356: Ghosh D, Srivastava GP, Xu D, Schulz LC, Roberts RM. A link between SIN1
(MAPKAP1) and poly(rC) binding protein 2 (PCBP2) in counteracting environmental
stress. Proc Natl Acad Sci U S A. 2008 Aug 19;105(33):11673-8. Epub 2008 Aug 7.
PubMed PMID: 18687895; PubMed Central PMCID: PMC2503925.
357: Ilva TJ, Eskola MJ, Nikus KC, Voipio-Pulkki LM, Lund J, Pulkki K, Mustonen
H, Niemelä KO, Karhunen PJ, Porela P. The etiology and prognostic significance of
cardiac troponin I elevation in unselected emergency department patients. J Emerg
Med. 2010 Jan;38(1):1-5. Epub 2008 Aug 8. PubMed PMID: 18687565.
358: Yang GJ, Vounatsou P, Tanner M, Zhou XN, Utzinger J. Remote sensing for
predicting potential habitats of Oncomelania hupensis in Hongze, Baima and Gaoyou
lakes in Jiangsu province, China. Geospat Health. 2006 Nov;1(1):85-92. PubMed
PMID: 18686234.
359: Shin KM, Lee KS, Chung MP, Han J, Bae YA, Kim TS, Chung MJ. Prognostic
determinants among clinical, thin-section CT, and histopathologic findings for
fibrotic idiopathic interstitial pneumonias: tertiary hospital study. Radiology.
2008 Oct;249(1):328-37. Epub 2008 Aug 5. PubMed PMID: 18682581.
360: Venmans LM, Bont J, Gorter KJ, Verheij TJ, Rutten GE, Hak E. Prediction of
complicated lower respiratory tract infections in older patients with diabetes.
Br J Gen Pract. 2008 Aug;58(553):564-8. PubMed PMID: 18682019; PubMed Central
PMCID: PMC2486383.
361: Haeuptle J, Zaborsky R, Fiumefreddo R, Trampuz A, Steffen I, Frei R,
Christ-Crain M, Müller B, Schuetz P. Prognostic value of procalcitonin in
Legionella pneumonia. Eur J Clin Microbiol Infect Dis. 2009 Jan;28(1):55-60. Epub
2008 Aug 2. PubMed PMID: 18677519.
362: Flaminio MJ, Tallmadge RL, Salles-Gomes CO, Matychak MB. Common variable
immunodeficiency in horses is characterized by B cell depletion in primary and
secondary lymphoid tissues. J Clin Immunol. 2009 Jan;29(1):107-16. Epub 2008 Aug
2. PubMed PMID: 18677444.
363: Pellegrino CM, Codeluppi M, Assenza S, Cocchi S, Di Benedetto F, Girardis M.
Incidence and clinical outcomes of ventilator-associated pneumonia in liver
transplant and non-liver transplant surgical patients. Transplant Proc. 2008
Jul-Aug;40(6):1986-8. PubMed PMID: 18675108.
364: García-Vázquez E, Soto S, Gómez J, Herrero JA. Simple criteria to assess
mortality in patients with community-acquired pneumonia. Med Clin (Barc). 2008
Jul 12;131(6):201-4. PubMed PMID: 18674497.
365: Cabré M, Serra-Prat M, Force L, Palomera E, Pallarés R. Functional status as
a risk factor for mortality in very elderly patients with pneumonia. Med Clin
(Barc). 2008 Jul 5;131(5):167-70. PubMed PMID: 18674485.
366: Ewig S, Welte T. CRB-65 for the assessment of pneumonia severity: who could
ask for more? Thorax. 2008 Aug;63(8):665-6. PubMed PMID: 18663064.
367: Karakachoff M, Battagliotti C, Maciel J, Gamba N. [Validation of a method to
predict the etiology of pneumonia in children]. Arch Argent Pediatr. 2008
Apr;106(2):126-31. Spanish. PubMed PMID: 18661037.
368: Seki M, Watanabe A, Mikasa K, Kadota J, Kohno S. Revision of the severity
rating and classification of hospital-acquired pneumonia in the Japanese
Respiratory Society guidelines. Respirology. 2008 Nov;13(6):880-5. Epub 2008 Jul
24. PubMed PMID: 18657061.
369: Hemmila MR, Jakubus JL, Maggio PM, Wahl WL, Dimick JB, Campbell DA Jr,
Taheri PA. Real money: complications and hospital costs in trauma patients.
Surgery. 2008 Aug;144(2):307-16. PubMed PMID: 18656640; PubMed Central PMCID:
PMC2583342.
370: Cheng HT, Cheng CL, Lin CH, Tang JH, Chu YY, Liu NJ, Chen PC. Caustic
ingestion in adults: the role of endoscopic classification in predicting outcome.
BMC Gastroenterol. 2008 Jul 25;8:31. PubMed PMID: 18655708; PubMed Central PMCID:
PMC2533005.
371: Shoham S, Pic-Aluas L, Taylor J, Cortez K, Rinaldi MG, Shea Y, Walsh TJ.
Transplant-associated Ochroconis gallopava infections. Transpl Infect Dis. 2008
Dec;10(6):442-8. Epub 2008 Jul 22. PubMed PMID: 18651872.
372: Kyung SY, Kim YJ, An CH, Lee SP, Park JW, Jeong SH. Clinical findings of the
patients with legal pulmonary disability--short-term follow-up at a tertiary
university hospital in Korea. Korean J Intern Med. 2008 Jun;23(2):72-7. PubMed
PMID: 18646509; PubMed Central PMCID: PMC2686977.
373: Xie Y, Wang L, He J, Wu T. Acupuncture for dysphagia in acute stroke.
Cochrane Database Syst Rev. 2008 Jul 16;(3):CD006076. Review. PubMed PMID:
18646136
374: Kim DN, Lazarus AA. Management of bronchiectasis. Dis Mon. 2008
Aug;54(8):540-6. Review. PubMed PMID: 18638622.
375: Baydarian M, Walter RN. Bronchiectasis: introduction, etiology, and clinical
features. Dis Mon. 2008 Aug;54(8):516-26. Review. PubMed PMID: 18638620.
376: Lazarus AA. Bronchiectasis in adults. Introduction. Dis Mon. 2008
Aug;54(8):515. PubMed PMID: 18638619.
377: Leikin JB. Bronchiectasis in adults. Foreword. Dis Mon. 2008 Aug;54(8):514.
PubMed PMID: 18638618.
378: Zhou QT, He B, Zhu H. Potential for cost-savings in the care of hospitalized
low-risk community-acquired pneumonia patients in China. Value Health. 2009
Jan;12(1):40-6. Epub 2008 Jul 10. PubMed PMID: 18637052.
379: Nakamura S, Horiuchi N, Katsura D, Shichijo K, Yoshida S, Harada E,
Matsushita T, Oshima Y, Matsuzaki Y, Tamaki Y, Kimura S, Takeichi T, Fujimoto H,
Masuda K, Iwasaka N, Shinomiya S. [A long-surviving patient with lung pleomorphic
carcinoma treated with postoperative carboplatin and paclitaxel combination
chemotherapy]. Gan To Kagaku Ryoho. 2008 Jun;35(6):965-8. Japanese. PubMed PMID:
18633226
380: Nagai S. [Interstitial pneumonia--diagnosis and therapy]. Gan To Kagaku
Ryoho. 2008 Jun;35(6):875-80. Review. Japanese. PubMed PMID: 18633212.
381: Nagai S, Handa T, Kim D. Pharmacotherapy in patients with idiopathic
pulmonary fibrosis. Expert Opin Pharmacother. 2008 Aug;9(11):1909-25. Review.
PubMed PMID: 18627329.
382: Bont J, Hak E, Hoes AW, Macfarlane JT, Verheij TJ. Predicting death in
elderly patients with community-acquired pneumonia: a prospective validation
study reevaluating the CRB-65 severity assessment tool. Arch Intern Med. 2008 Jul
14;168(13):1465-8. PubMed PMID: 18625928.
383: Nadarajan P, Wilson L, Mohammed B, Connor M, Lane SJ. Compliance in the
measurement of CURB-65 in patients with community acquired pneumonia and
potential implications for early discharge. Ir Med J. 2008 May;101(5):144-6.
PubMed PMID: 18624261.
384: Matsumoto N, Sasaki T, Nakao H, Katoh T, Fukuda Y, Nakazato M, Okayama A. An
outbreak of Legionnaires' disease associated with a circulating bathwater system
at a public bathhouse. II: radiological findings of pneumonia. J Infect
Chemother. 2008 Apr;14(2):123-9. Epub 2008 Apr 30. PubMed PMID: 18622675.
385: Prasad A, Tsimikas S. Candidate biomarkers for the detection of coronary
plaque destabilization and rupture. Curr Atheroscler Rep. 2008 Aug;10(4):309-317.
PubMed PMID: 18618976.
386: Blachowicz A, Chudzinski W, Nawrot I, Kryszalowicz B, Spiechowicz U, Szmidt
J, Wiecek A, Franek E. Serum 1-84 and 7-84 parathyroid hormone concentrations and
bone in patients with primary hyperparathyroidism. Langenbecks Arch Surg. 2008
Sep;393(5):709-13. Epub 2008 Jul 11. PubMed PMID: 18618138.
387: Masiero S, Pierobon R, Previato C, Gomiero E. Pneumonia in stroke patients
with oropharyngeal dysphagia: a six-month follow-up study. Neurol Sci. 2008
Jun;29(3):139-45. Epub 2008 Jul 9. PubMed PMID: 18612760.
388: Scheenstra RJ, Rijntjes E, Tavy DL, Kingma H, Heijerman HG.
Vestibulotoxicity as a consequence of systemically administered tobramycin in
cystic fibrosis patients. Acta Otolaryngol. 2009 Jan;129(1):4-7. PubMed PMID:
18607923
389: Jones AE, Saak K, Kline JA. Performance of the Mortality in Emergency
Department Sepsis score for predicting hospital mortality among patients with
severe sepsis and septic shock. Am J Emerg Med. 2008 Jul;26(6):689-92. PubMed
PMID: 18606322; PubMed Central PMCID: PMC2713792.
390: Daniel C, Kriegel I, Di Maria S, Patrubani G, Livartowski A, Estève M.
[Using a pleural implantable access system for the management of malignant
pleural effusions. Experience of Institut Curie]. Rev Pneumol Clin. 2008
Feb;64(1):8-14. French. PubMed PMID: 18603173.
391: Mandal RV, Mark EJ, Kradin RL. Organizing pneumonia and pulmonary lymphatic
architecture in diffuse alveolar damage. Hum Pathol. 2008 Aug;39(8):1234-8. Epub
2008 Jul 7. PubMed PMID: 18602671.
392: Owston MA, Van Alstine WG, Couetil LL, Miskovic M. Cholangiectasis and
duodenal diverticulosis in a farm-raised elk (Cervus elaphus). J Vet Diagn
Invest. 2008 Jul;20(4):517-20. PubMed PMID: 18599862.
393: Gibson RS, Hess SY, Hotz C, Brown KH. Indicators of zinc status at the
population level: a review of the evidence. Br J Nutr. 2008 Jun;99 Suppl
3:S14-23. Review. PubMed PMID: 18598584.
394: Simoes-Barbosa A, Meloni D, Wohlschlegel JA, Konarska MM, Johnson PJ.
Spliceosomal snRNAs in the unicellular eukaryote Trichomonas vaginalis are
structurally conserved but lack a 5'-cap structure. RNA. 2008 Aug;14(8):1617-31.
Epub 2008 Jul 2. PubMed PMID: 18596255; PubMed Central PMCID: PMC2491460.
395: Korytovskaia MA, Sarkisian NI, Tishman MI, Ulanova IN. [Features of
eosinophilic pneumonia course in the outpatient setting]. Klin Med (Mosk).
2008;86(5):64-5. Russian. PubMed PMID: 18589721.
396: Aki ZS, Sucak GT, Yeğin ZA, Güzel O, Erbaş G, Senol E. Hematopoietic stem
cell transplantation in patients with active fungal infection: not a
contraindication for transplantation. Transplant Proc. 2008 Jun;40(5):1579-85.
PubMed PMID: 18589155.
397: Tsurikisawa N, Saito H, Tsuburai T, Oshikata C, Ono E, Mitomi H, Akiyama K.
Differences in regulatory T cells between Churg-Strauss syndrome and chronic
eosinophilic pneumonia with asthma. J Allergy Clin Immunol. 2008
Sep;122(3):610-6. Epub 2008 Jun 30. PubMed PMID: 18586318.
398: Kollef MH, Morrow LE, Baughman RP, Craven DE, McGowan JE Jr, Micek ST,
Niederman MS, Ost D, Paterson DL, Segreti J. Health care-associated pneumonia
(HCAP): a critical appraisal to improve identification, management, and
outcomes--proceedings of the HCAP Summit. Clin Infect Dis. 2008 Apr 15;46 Suppl
4:S296-334; quiz 335-8. PubMed PMID: 18429676.
399: Baldwin LN, Lowe AD. Panton-Valentine Leukocidin associated with community
acquired methicillin resistant Staphylococcus aureus: a case report and review of
interim guidelines. Anaesthesia. 2008 Jul;63(7):764-6. Review. PubMed PMID:
18582262
400: Gutiérrez F, Masiá M. Improving outcomes of elderly patients with
community-acquired pneumonia. Drugs Aging. 2008;25(7):585-610. Review. PubMed
PMID: 18582147.
401: Kitzmann AS, Goins KM, Reed C, Padnick-Silver L, Macsai MS, Sutphin JE. Eye
bank survey of surgeons using precut donor tissue for descemet stripping
automated endothelial keratoplasty. Cornea. 2008 Jul;27(6):634-9. PubMed PMID:
18580252
402: Kuznetsov NA, Romodan GV, Shalaeva TI, Nalivaĭskiĭ AA. [The ways of
improvement of pancratonecrosis treatment]. Khirurgiia (Mosk). 2008;(5):40-5.
Russian. PubMed PMID: 18577970.
403: Carbone R, Balleari E, Grosso M, Montanaro F, Bottino G, Ghio R. Predictors
of mortality of idiopathic pulmonary fibrosis. Eur Rev Med Pharmacol Sci. 2008
Mar-Apr;12(2):97-104. Review. PubMed PMID: 18575159.
404: Thomsen RW, Kasatpibal N, Riis A, Nørgaard M, Sørensen HT. The impact of
pre-existing heart failure on pneumonia prognosis: population-based cohort study.
J Gen Intern Med. 2008 Sep;23(9):1407-13. Epub 2008 Jun 24. PubMed PMID:
18574639; PubMed Central PMCID: PMC2517996.
405: Boonsarngsuk V, Sirilak S, Kiatboonsri S. Acute respiratory failure due to
Pneumocystis pneumonia: outcome and prognostic factors. Int J Infect Dis. 2009
Jan;13(1):59-66. Epub 2008 Jun 24. PubMed PMID: 18573675.
406: Ko FW, Ip M, Chan PK, Ng SS, Chau SS, Hui DS. A one-year prospective study
of infectious etiology in patients hospitalized with acute exacerbations of COPD
and concomitant pneumonia. Respir Med. 2008 Aug;102(8):1109-16. Epub 2008 Jun 24.
PubMed PMID: 18573648.
407: Aziz A, Healey JM, Qureshi F, Kane TD, Kurland G, Green M, Hackam DJ.
Comparative analysis of chest tube thoracostomy and video-assisted thoracoscopic
surgery in empyema and parapneumonic effusion associated with pneumonia in
children. Surg Infect (Larchmt). 2008 Jun;9(3):317-23. PubMed PMID: 18570573.
408: Menchine MD, Barrett TW, Schriger DL. Annals of Emergency Medicine Journal
Club. Risk prediction with procalcitonin and clinical rules in community-acquired
pneumonia. Ann Emerg Med. 2008 Jul;52(1):59-60. PubMed PMID: 18565380.
409: Hecker E, Hamouri S. [Video-assisted thoracoscopic surgery (VATS) for the
management of parapneumonic pleural empyema]. Zentralbl Chir. 2008
Jun;133(3):212-7. Review. German. PubMed PMID: 18563683.
410: Machtay M, Moughan J, Trotti A, Garden AS, Weber RS, Cooper JS, Forastiere
A, Ang KK. Factors associated with severe late toxicity after concurrent
chemoradiation for locally advanced head and neck cancer: an RTOG analysis. J
Clin Oncol. 2008 Jul 20;26(21):3582-9. Epub 2008 Jun 16. PubMed PMID: 18559875.
411: Skull SA, Andrews RM, Byrnes GB, Campbell DA, Kelly HA, Brown GV, Nolan TM.
Hospitalized community-acquired pneumonia in the elderly: an Australian
case-cohort study. Epidemiol Infect. 2009 Feb;137(2):194-202. Epub 2008 Jun 18.
PubMed PMID: 18559126.
412: Charles PG, Wolfe R, Whitby M, Fine MJ, Fuller AJ, Stirling R, Wright AA,
Ramirez JA, Christiansen KJ, Waterer GW, Pierce RJ, Armstrong JG, Korman TM,
Holmes P, Obrosky DS, Peyrani P, Johnson B, Hooy M; Australian Community-Acquired
Pneumonia Study Collaboration, Grayson ML. SMART-COP: a tool for predicting the
need for intensive respiratory or vasopressor support in community-acquired
pneumonia. Clin Infect Dis. 2008 Aug 1;47(3):375-84. PubMed PMID: 18558884.
413: Curran A, Falcó V, Crespo M, Martinez X, Ribera E, Villar del Saz S, Imaz A,
Coma E, Ferrer A, Pahissa A. Bacterial pneumonia in HIV-infected patients: use of
the pneumonia severity index and impact of current management on incidence,
aetiology and outcome. HIV Med. 2008 Oct;9(8):609-15. Epub 2008 Jun 28. PubMed
PMID: 18557951.
414: Magnotti LJ, Schroeppel TJ, Fabian TC, Clement LP, Swanson JM, Fischer PE,
Bee TK, Maish GO 3rd, Minard G, Zarzaur BL, Croce MA. Reduction in inadequate
empiric antibiotic therapy for ventilator-associated pneumonia: impact of a
unit-specific treatment pathway. Am Surg. 2008 Jun;74(6):516-22; discussion
522-3. PubMed PMID: 18556994.
415: Alvarez-Martínez MJ, Moreno A, Miró JM, Valls ME, Rivas PV, de Lazzari E,
Sued O, Benito N, Domingo P, Ribera E, Santín M, Sirera G, Segura F, Vidal F,
Rodríguez F, Riera M, Cordero ME, Arribas JR, Jiménez de Anta MT, Gatell JM,
Wilson PE, Meshnick SR; Spanish PCP Working Group. Pneumocystis jirovecii
pneumonia in Spanish HIV-infected patients in the combined antiretroviral therapy
era: prevalence of dihydropteroate synthase mutations and prognostic factors of
mortality. Diagn Microbiol Infect Dis. 2008 Sep;62(1):34-43. Epub 2008 Jun 12.
PubMed PMID: 18554841.
416: Saner FH, Olde Damink SW, Pavlakovic G, van den Broek MA, Rath PM,
Sotiropoulos GC, Radtke A, Canbay A, Paul A, Nadalin S, Malagó M, Broelsch CE.
Pulmonary and blood stream infections in adult living donor and cadaveric liver
transplant patients. Transplantation. 2008 Jun 15;85(11):1564-8. PubMed PMID:
18551060
417: Wei B, Hemmila MR, Arbabi S, Taheri PA, Wahl WL. Angioembolization reduces
operative intervention for blunt splenic injury. J Trauma. 2008 Jun;64(6):1472-7.
PubMed PMID: 18545111.
418: Hauser H, Zach O, Krieger O, Kasparu H, Koenig J, Girschikofsky M, Oberbauer
R, Lutz D. A single nucleotide polymorphism at chromosome 2q21.3 (LCT -13910C>T)
associates with clinical outcome after allogeneic hematopoietic stem cell
transplantation. Blood. 2008 Sep 1;112(5):2156-9. Epub 2008 Jun 10. PubMed PMID:
18544679
419: Brunsvold ME, Arbabi S, Dimo M, Wahl W. Drotrecogin alfa in patients with
burns and soft tissue injury. J Burn Care Res. 2008 Jul-Aug;29(4):676-8. PubMed
PMID: 18535466.
420: Murray S, Charbeneau J, Marshall BC, LiPuma JJ. Impact of burkholderia
infection on lung transplantation in cystic fibrosis. Am J Respir Crit Care Med.
2008 Aug 15;178(4):363-71. Epub 2008 Jun 5. PubMed PMID: 18535253.
421: Tsalkidis A, Gardikis S, Cassimos D, Kambouri K, Tsalkidou E, Deftereos S,
Chatzimichael A. Acute abdomen in children due to extra-abdominal causes. Pediatr
Int. 2008 Jun;50(3):315-8. PubMed PMID: 18533944.
422: Ramirez J, Aliberti S, Mirsaeidi M, Peyrani P, Filardo G, Amir A, Moffett B,
Gordon J, Blasi F, Bordon J. Acute myocardial infarction in hospitalized patients
with community-acquired pneumonia. Clin Infect Dis. 2008 Jul 15;47(2):182-7.
PubMed PMID: 18533841.
423: Chautemps N, Milési C, Cambonie G, Duquesne F, Adra-Delenne AL, Ferragu F,
Mouba J, Morin D, Picaud JC. [Pneumococcal hemolytic uremic syndrome: about 2
cases]. Arch Pediatr. 2008 Jul;15(7):1206-10. Epub 2008 Jun 3. French. PubMed
PMID: 18524552.
424: Seligman R, Papassotiriou J, Morgenthaler NG, Meisner M, Teixeira PJ.
Prognostic value of midregional pro-atrial natriuretic peptide in
ventilator-associated pneumonia. Intensive Care Med. 2008 Nov;34(11):2084-91.
Epub 2008 Jun 4. PubMed PMID: 18523752.
425: Moammar MQ, Azam HM, Blamoun AI, Rashid AO, Ismail M, Khan MA, DeBari VA.
Alveolar-arterial oxygen gradient, pneumonia severity index and outcomes in
patients hospitalized with community acquired pneumonia. Clin Exp Pharmacol
Physiol. 2008 Sep;35(9):1032-7. Epub 2008 Jun 1. PubMed PMID: 18518885.
426: Balassy C, Kulemann V, Hörmann M. [Malignant pulmonary tumors in children].
Radiologe. 2008 Oct;48(10):955-61. Review. German. PubMed PMID: 18516579.
427: Lee JG, Cho BC, Bae MK, Lee CY, Park IK, Kim DJ, Ahn SV, Chung KY.
Preoperative C-reactive protein levels are associated with tumor size and
lymphovascular invasion in resected non-small cell lung cancer. Lung Cancer. 2009
Jan;63(1):106-10. Epub 2008 Jun 2. PubMed PMID: 18513823.
428: Cosentini R, Tarsia P, Canetta C, Graziadei G, Brambilla AM, Aliberti S,
Pappalettera M, Tantardini F, Blasi F. Severe asthma exacerbation: role of acute
Chlamydophila pneumoniae and Mycoplasma pneumoniae infection. Respir Res. 2008
May 30;9:48. PubMed PMID: 18513407; PubMed Central PMCID: PMC2435234.
429: Johnstone J, Majumdar SR, Marrie TJ. The value of prognostic indices for
pneumonia. Curr Infect Dis Rep. 2008 May;10(3):215-22. PubMed PMID: 18510884.
430: Tanaseanu C, Bergallo C, Teglia O, Jasovich A, Oliva ME, Dukart G, Dartois
N, Cooper CA, Gandjini H, Mallick R; 308 Study Group; 313 Study Group. Integrated
results of 2 phase 3 studies comparing tigecycline and levofloxacin in
community-acquired pneumonia. Diagn Microbiol Infect Dis. 2008 Jul;61(3):329-38.
Epub 2008 May 27. PubMed PMID: 18508226.
431: Maksimovic O, Horger M, Pintoffl JP, Ernemann U. [Imaging of nocardiosis].
Rofo. 2008 Jun;180(6):489-92. German. PubMed PMID: 18504653.
432: Kawakami T, Mizoguchi M, Saito R, Soma Y. Histopathological evidence of
small-vessel vasculitis within the skin and lungs associated with interstitial
pneumonia in an adult patient with dermatomyositis. Clin Exp Dermatol. 2008
Jul;33(4):415-7. Epub 2008 May 21. PubMed PMID: 18498411.
433: Jeena PM, Bobat B, Thula SA, Adhikari M. Children with Pneumocystis jiroveci
pneumonia and acute hypoxaemic respiratory failure admitted to a PICU, Durban,
South Africa. Arch Dis Child. 2008 Jun;93(6):545. PubMed PMID: 18495915.
434: Chalmers JD, Singanayagam A, Hill AT. Systolic blood pressure is superior to
other haemodynamic predictors of outcome in community acquired pneumonia. Thorax.
2008 Aug;63(8):698-702. Epub 2008 May 20. PubMed PMID: 18492742.
435: Jaffe A, Calder AD, Owens CM, Stanojevic S, Sonnappa S. Role of routine
computed tomography in paediatric pleural empyema. Thorax. 2008
Oct;63(10):897-902. Epub 2008 May 20. PubMed PMID: 18492739.
436: Mistiaen W, Vissers D. The risk of postoperative pulmonary or pleural
complications after aortic valve replacement is low in elderly patients: an
observational study. Aust J Physiother. 2008;54(2):119-24. PubMed PMID: 18492003.
437: Ioachimescu OC, Stoller JK. Diffuse alveolar hemorrhage: diagnosing it and
finding the cause. Cleve Clin J Med. 2008 Apr;75(4):258, 260, 264-5 passim.
Review. PubMed PMID: 18491433.
438: Capelastegui A, España PP, Bilbao A, Martinez-Vazquez M, Gorordo I, Oribe M,
Urrutia I, Quintana JM. Pneumonia: criteria for patient instability on hospital
discharge. Chest. 2008 Sep;134(3):595-600. Epub 2008 May 19. PubMed PMID:
18490403
439: Cottin V, Cordier JF. [Idiopathic pulmonary fibrosis]. Presse Med. 2008
Nov;37(11):1581-90. Epub 2008 May 16. Review. French. PubMed PMID: 18486432.
440: Johnson AW, Osinusi K, Aderele WI, Gbadero DA, Olaleye OD, Adeyemi-Doro FA.
Etiologic agents and outcome determinants of community-acquired pneumonia in
urban children: a hospital-based study. J Natl Med Assoc. 2008 Apr;100(4):370-85.
PubMed PMID: 18481475.
441: Moonnumakal SP, Fan LL. Bronchiolitis obliterans in children. Curr Opin
Pediatr. 2008 Jun;20(3):272-8. Review. PubMed PMID: 18475095.
442: Gustafsson BI, Kidd M, Chan A, Malfertheiner MV, Modlin IM. Bronchopulmonary
neuroendocrine tumors. Cancer. 2008 Jul 1;113(1):5-21. Review. PubMed PMID:
18473355
443: Mohler JL. A role for the androgen-receptor in clinically localized and
advanced prostate cancer. Best Pract Res Clin Endocrinol Metab. 2008
Apr;22(2):357-72. Review. PubMed PMID: 18471792; PubMed Central PMCID:
PMC2799036.
444: Magnotti LJ, Fischer PE, Zarzaur BL, Fabian TC, Croce MA. Impact of gender
on outcomes after blunt injury: a definitive analysis of more than 36,000 trauma
patients. J Am Coll Surg. 2008 May;206(5):984-91; discussion 991-2. Epub 2008 Mar
17. PubMed PMID: 18471739.
445: Williams RF, Fabian TC, Fischer PE, Zarzaur BL, Magnotti LJ, Croce MA.
Impact of airbags on a Level I trauma center: injury patterns, infectious
morbidity, and hospital costs. J Am Coll Surg. 2008 May;206(5):962-8; discussion
968-9. Epub 2008 Mar 4. PubMed PMID: 18471735.
446: Agarwal R, Jindal SK. Acute exacerbation of idiopathic pulmonary fibrosis: a
systematic review. Eur J Intern Med. 2008 Jun;19(4):227-35. Epub 2008 Jan 16.
Review. PubMed PMID: 18471669.
447: Lee JO, Kim DY, Lim JH, Seo MD, Yi HG, Kim YJ, Lee SH, Kim DW, Yang SC, Kim
YW, Heo DS. Risk factors for bacterial pneumonia after cytotoxic chemotherapy in
advanced lung cancer patients. Lung Cancer. 2008 Dec;62(3):381-4. Epub 2008 May
7. PubMed PMID: 18466999.
448: Jørgensen J, Ytting H, Steffensen RM, Nielsen HJ. [Mannan-binding lectin and
MBL-associated serine protease-2]. Ugeskr Laeger. 2008 Apr 21;170(17):1445-8.
Review. Danish. PubMed PMID: 18462622.
449: Marcus N, Mor M, Amir L, Mimouni M, Waisman Y. Validity of the quick-read
C-reactive protein test in the prediction of bacterial pneumonia in the pediatric
emergency department. Eur J Emerg Med. 2008 Jun;15(3):158-61. PubMed PMID:
18460957
450: Khalil KF, Saeed W. Swyer-James-MacLeod Syndrome. J Coll Physicians Surg
Pak. 2008 Mar;18(3):190-2. PubMed PMID: 18460255.
451: Hata M, Sezai A, Niino T, Yoda M, Unosawa S, Furukawa N, Osaka S, Murakami
T, Minami K. Should emergency surgical intervention be performed for an
octogenarian with type A acute aortic dissection? J Thorac Cardiovasc Surg. 2008
May;135(5):1042-6. PubMed PMID: 18455582.
452: Nenner F. The prognosis. J Palliat Med. 2008 May;11(4):641-2. PubMed PMID:
18454621
453: Mølle I, Ostergaard M, Melsvik D, Nyvold CG. Infectious complications after
chemotherapy and stem cell transplantation in multiple myeloma: implications of
Fc gamma receptor and myeloperoxidase promoter polymorphisms. Leuk Lymphoma. 2008
Jun;49(6):1116-22. PubMed PMID: 18452102.
454: Qian L, Liu C, Zhuang W, Guo Y, Yu J, Chen H, Wang S, Lin Z, Xia S, Ni L,
Liu X, Chen C, Sun B; Chinese Collaborative Study Group for Neonatal Respiratory
Diseases. Neonatal respiratory failure: a 12-month clinical epidemiologic study
from 2004 to 2005 in China. Pediatrics. 2008 May;121(5):e1115-24. PubMed PMID:
18450855
455: Davey PG, Marwick C. Appropriate vs. inappropriate antimicrobial therapy.
Clin Microbiol Infect. 2008 Apr;14 Suppl 3:15-21. Review. PubMed PMID: 18318875.
456: Baddley JW, Perfect JR, Oster RA, Larsen RA, Pankey GA, Henderson H, Haas
DW, Kauffman CA, Patel R, Zaas AK, Pappas PG. Pulmonary cryptococcosis in
patients without HIV infection: factors associated with disseminated disease. Eur
J Clin Microbiol Infect Dis. 2008 Oct;27(10):937-43. Epub 2008 May 1. PubMed
PMID: 18449582.
457: Reyes S, Martinez R, Vallés JM, Cases E, Menendez R. Determinants of
hospital costs in community-acquired pneumonia. Eur Respir J. 2008
May;31(5):1061-7. PubMed PMID: 18448502.
458: White GN, O'Rourke F, Ong BS, Cordato DJ, Chan DK. Dysphagia: causes,
assessment, treatment, and management. Geriatrics. 2008 May;63(5):15-20. Review.
PubMed PMID: 18447407.
459: Gel'tser BI, Brodskaia TA. [Central arterial pressure in patients with
chronic obstructive pulmonary disease]. Ter Arkh. 2008;80(3):15-9. Russian.
PubMed PMID: 18441677.
460: Loeb S, Roehl KA, Thaxton CS, Catalona WJ. Combined prostate-specific
antigen density and biopsy features to predict "clinically insignificant"
prostate cancer. Urology. 2008 Jul;72(1):143-7. Epub 2008 Apr 24. PubMed PMID:
18436287
461: Ide R, Mizoue T, Fujino Y, Kubo T, Pham TM, Shirane K, Ogimoto I, Tokui N,
Yoshimura T. Oral symptoms predict mortality: a prospective study in Japan. J
Dent Res. 2008 May;87(5):485-9. PubMed PMID: 18434582.
462: Shyamsundar M, McAuley DF. KL-6 in acute lung injury: will it leave its
mark? Crit Care. 2008;12(2):121. Epub 2008 Mar 31. PubMed PMID: 18423068; PubMed
Central PMCID: PMC2447564.
463: Tseng JS, Chan MC, Hsu JY, Kuo BI, Wu CL. Procalcitonin is a valuable
prognostic marker in ARDS caused by community-acquired pneumonia. Respirology.
2008 Jun;13(4):505-9. Epub 2008 Apr 14. PubMed PMID: 18422867.
464: Kakugawa T, Mukae H, Saito M, Ishii K, Ishimoto H, Sakamoto N, Takazono T,
Fukuda Y, Ooe N, Kohno S. Rapidly progressive interstitial pneumonia associated
with clinically amyopathic dermatomyositis successfully treated with polymyxin
B-immobilized fiber column hemoperfusion. Intern Med. 2008;47(8):785-90. Epub
2008 Apr 16. PubMed PMID: 18421199.
465: Torres A, Garau J, Arvis P, Carlet J, Choudhri S, Kureishi A, Le Berre MA,
Lode H, Winter J, Read RC; MOTIV (MOxifloxacin Treatment IV) Study Group.
Moxifloxacin monotherapy is effective in hospitalized patients with
community-acquired pneumonia: the MOTIV study--a randomized clinical trial. Clin
Infect Dis. 2008 May 15;46(10):1499-509. PubMed PMID: 18419482.
466: Ruiz LA, Zalacain R, Gómez A, Camino J, Jaca C, Núñez JM. Escherichia coli:
an unknown and infrequent cause of community acquired pneumonia. Scand J Infect
Dis. 2008;40(5):424-7. PubMed PMID: 18418804.
467: Moeller JJ, Ma M, Hernandez P, Marrie T, Touchie C, Patrick W. Discharge
Delay in Patients with Community-acquired Pneumonia Managed on a Critical
Pathway. Can J Infect Dis Med Microbiol. 2006 Mar;17(2):109-13. PubMed PMID:
18418484; PubMed Central PMCID: PMC2095063.
468: Memish ZA, Arabi YM, Ahmed QA, Shibl AM, Niederman MS; GCC CAP Working
Group. Management and prevention strategies for community-acquired pneumonia in
the Gulf Corporation Council. J Chemother. 2007 Oct;19 Suppl 1:33-46. PubMed
PMID: 18073168.
469: Livingston DH, Shogan B, John P, Lavery RF. CT diagnosis of Rib fractures
and the prediction of acute respiratory failure. J Trauma. 2008 Apr;64(4):905-11.
PubMed PMID: 18404055.
470: Redgrave JN, Gallagher P, Lovett JK, Rothwell PM. Critical cap thickness and
rupture in symptomatic carotid plaques: the oxford plaque study. Stroke. 2008
Jun;39(6):1722-9. Epub 2008 Apr 10. PubMed PMID: 18403733.
471: Pelosi P, Barassi A, Severgnini P, Gomiero B, Finazzi S, Merlini G, d'Eril
GM, Chiaranda M, Niederman MS. Prognostic role of clinical and laboratory
criteria to identify early ventilator-associated pneumonia in brain injury.
Chest. 2008 Jul;134(1):101-8. Epub 2008 Apr 10. PubMed PMID: 18403669.
472: Kamp R, Sun X, Garcia JG. Making genomics functional: deciphering the
genetics of acute lung injury. Proc Am Thorac Soc. 2008 Apr 15;5(3):348-53.
PubMed PMID: 18403332; PubMed Central PMCID: PMC2645247.
473: Enomoto N, Suda T, Uto T, Kato M, Kaida Y, Ozawa Y, Miyazaki H, Kuroishi S,
Hashimoto D, Naito T, Fujisawa T, Matsui T, Inui N, Nakamura Y, Sato J, Mizuguchi
T, Kato A, Chida K. Possible therapeutic effect of direct haemoperfusion with a
polymyxin B immobilized fibre column (PMX-DHP) on pulmonary oxygenation in acute
exacerbations of interstitial pneumonia. Respirology. 2008 May;13(3):452-60.
PubMed PMID: 18399872.
474: Ozbay B, Sertoğullarindan B, Tekin M, Altinoz O. Influenza-associated
pneumonia in a Turkish area with endemic avian influenza. Respirology. 2008
May;13(3):444-6. PubMed PMID: 18399870.
475: Yu AJ, Fang SH, Gao YL. [Analysis of therapeutic result and prognostic
factor in primary fallopian tube carcinoma]. Zhonghua Zhong Liu Za Zhi. 2007
Oct;29(10):789-93. Chinese. PubMed PMID: 18396696.
476: Ma SK, Zhang HT, Wu LY, Liu LY. [Prognostic analysis of 88 patients with
ovarian clear cell carcinoma]. Zhonghua Zhong Liu Za Zhi. 2007 Oct;29(10):784-8.
Chinese. PubMed PMID: 18396695.
477: Kallinen O, Partanen TA, Maisniemi K, Böhling T, Tukiainen E, Koljonen V.
Comparison of premortem clinical diagnosis and autopsy findings in patients with
burns. Burns. 2008 Aug;34(5):595-602. Epub 2008 Apr 18. PubMed PMID: 18395991.
478: Signori LG, Ferreira MW, Vieira LC, Müller KR, Mattos WL. Sputum examination
in the clinical management of community-acquired pneumonia. J Bras Pneumol. 2008
Mar;34(3):152-8. English, Portuguese. PubMed PMID: 18392463.
479: Haas TA. Allosteric regulation of alpha(IIb)beta(3) by beta(3) 95-105.
Thromb Haemost. 2008 Apr;99(4):701-10. PubMed PMID: 18392328.
480: Visscher S, Kruisheer EM, Schurink CA, Lucas PJ, Bonten MJ. Predicting
pathogens causing ventilator-associated pneumonia using a Bayesian network model.
J Antimicrob Chemother. 2008 Jul;62(1):184-8. Epub 2008 Apr 4. PubMed PMID:
18390883
481: Herruzo R, Banegas JR, Cruz JJ, Garcia-Torres V, Fernandez-Aceñero MJ. The
Etiology of Bacteremia or Pneumonia as a Prognostic Factor for Death in Burn
Patients, After a 10-Day in Intensive Care Unit. J Burn Care Res. 2008 Apr 2.
[Epub ahead of print] PubMed PMID: 18388572.
482: Travis WD, Hunninghake G, King TE Jr, Lynch DA, Colby TV, Galvin JR, Brown
KK, Chung MP, Cordier JF, du Bois RM, Flaherty KR, Franks TJ, Hansell DM, Hartman
TE, Kazerooni EA, Kim DS, Kitaichi M, Koyama T, Martinez FJ, Nagai S, Midthun DE,
Müller NL, Nicholson AG, Raghu G, Selman M, Wells A. Idiopathic nonspecific
interstitial pneumonia: report of an American Thoracic Society project. Am J
Respir Crit Care Med. 2008 Jun 15;177(12):1338-47. Epub 2008 Apr 3. Review.
Erratum in: Am J Respir Crit Care Med.2008 Jul 15;178(2): 211. PubMed PMID:
18388353
483: Delerme S, Ray P. Acute respiratory failure in the elderly: diagnosis and
prognosis. Age Ageing. 2008 May;37(3):251-7. Epub 2008 Apr 3. Review. PubMed
PMID: 18388161.
484: Jones AE, Kline JA. Risk stratification of community-acquired pneumonia:
what does all of this mean? Ann Emerg Med. 2008 Jul;52(1):61-2. Epub 2008 Apr 3.
PubMed PMID: 18387703.
485: Querol-Ribelles JM, Tenías JM, Forés R, Vila G, Lillo A, Beneyto M, Torres
J. [Antibiotic treatment onset delay and clinical evolution in admitted patients
with community-acquired pneumonia]. Med Clin (Barc). 2008 Mar 22;130(10):366-70.
Spanish. PubMed PMID: 18381027.
486: Osipov MIu, Bilev AE, Osipov IuA. [Microbial intestinal biocenosis in
lingering and complicated course of community pneumonia]. Ter Arkh.
2008;80(2):52-7. Russian. PubMed PMID: 18372597.
487: Zuberi FF, Khan JA. Prospective comparison of prediction rules of mortality
risk for CAP in a developing country. Int J Tuberc Lung Dis. 2008
Apr;12(4):447-52. PubMed PMID: 18371273.
488: Yende S, D'Angelo G, Kellum JA, Weissfeld L, Fine J, Welch RD, Kong L,
Carter M, Angus DC; GenIMS Investigators. Inflammatory markers at hospital
discharge predict subsequent mortality after pneumonia and sepsis. Am J Respir
Crit Care Med. 2008 Jun 1;177(11):1242-7. Epub 2008 Mar 27. PubMed PMID:
18369199; PubMed Central PMCID: PMC2720087.
489: Bird MD, Kovacs EJ. Organ-specific inflammation following acute ethanol and
burn injury. J Leukoc Biol. 2008 Sep;84(3):607-13. Epub 2008 Mar 24. Review.
PubMed PMID: 18362209; PubMed Central PMCID: PMC2516898.
490: Takahashi M, Yamamoto M, Kunugi S, Ishizaki M, Fukuda Y. Significance of
angiogenesis in the intra-alveolar fibrosis in interstitial pneumonia. J Nippon
Med Sch. 2008 Feb;75(1):48-9. PubMed PMID: 18360081.
491: Li M, Chen ZG, Zhang CR, Lin JC, Zeng M. [Analysis of the risk factors of
pulmonary fungal infections related to mechanical ventilation and prognosis of
the patients]. Nan Fang Yi Ke Da Xue Xue Bao. 2008 Mar;28(3):463-6. Chinese.
PubMed PMID: 18359715.
492: Albert M, Friedrich JO, Adhikari NK, Day AG, Verdant C, Heyland DK; Canadian
Critical Care Trials Group. Utility of Gram stain in the clinical management of
suspected ventilator-associated pneumonia. Secondary analysis of a multicenter
randomized trial. J Crit Care. 2008 Mar;23(1):74-81. PubMed PMID: 18359424.
493: Chau V, Clément JF, Robitaille Y, D'Anjou G, Vanasse M. Congenital axonal
neuropathy and encephalopathy. Pediatr Neurol. 2008 Apr;38(4):261-6. PubMed PMID:
18358405
494: Lloyd A, Holman A, Evers T. A cost-minimisation analysis comparing
moxifloxacin with levofloxacin plus ceftriaxone for the treatment of patients
with community-acquired pneumonia in Germany: results from the MOTIV trial. Curr
Med Res Opin. 2008 May;24(5):1279-84. Epub 2008 Mar 20. PubMed PMID: 18358083.
495: Katan M, Müller B, Christ-Crain M. Copeptin: a new and promising diagnostic
and prognostic marker. Crit Care. 2008;12(2):117. Epub 2008 Mar 6. PubMed PMID:
18355399; PubMed Central PMCID: PMC2447549.
496: Nakane T, Nakamae H, Kamoi H, Koh H, Takeoka Y, Sakamoto E, Kanashima H,
Nakamae M, Ohta K, Terada Y, Koh KR, Yamane T, Hino M. Prognostic value of serum
surfactant protein D level prior to transplant for the development of
bronchiolitis obliterans syndrome and idiopathic pneumonia syndrome following
allogeneic hematopoietic stem cell transplantation. Bone Marrow Transplant. 2008
Jul;42(1):43-9. Epub 2008 Mar 17. PubMed PMID: 18347569.
497: Shinoura N, Yamada R, Tabei Y, Saito K, Nakamura O, Takahashi M.
[Temozolomide: Temodal]. Gan To Kagaku Ryoho. 2008 Mar;35(3):543-7. Japanese.
PubMed PMID: 18347414.
498: Huang DT, Weissfeld LA, Kellum JA, Yealy DM, Kong L, Martino M, Angus DC;
GenIMS Investigators. Risk prediction with procalcitonin and clinical rules in
community-acquired pneumonia. Ann Emerg Med. 2008 Jul;52(1):48-58.e2. Epub 2008
Mar 17. PubMed PMID: 18342993; PubMed Central PMCID: PMC2775454.
499: Marosi C, Hassler M, Roessler K, Reni M, Sant M, Mazza E, Vecht C.
Meningioma. Crit Rev Oncol Hematol. 2008 Aug;67(2):153-71. Epub 2008 Mar 14.
Review. PubMed PMID: 18342535.
500: Perelló R, Moreno A, Camps M, Cervera C, Linares L, Pumarola T, Marcos MA.
[Human immunodeficiency virus-infected patients with community-acquired
pneumonia: implication of respiratory viruses]. Enferm Infecc Microbiol Clin.
2008 Feb;26(2):85-7. Spanish. PubMed PMID: 18341920.
501: Eisenhut M. A persistently elevated C-reactive protein level in pneumonia
may indicate empyema. Crit Care. 2008;12(1):409; author reply 409. PubMed PMID:
18341702; PubMed Central PMCID: PMC2374620.
502: Trahan S, Hanak V, Ryu JH, Myers JL. Role of surgical lung biopsy in
separating chronic hypersensitivity pneumonia from usual interstitial
pneumonia/idiopathic pulmonary fibrosis: analysis of 31 biopsies from 15
patients. Chest. 2008 Jul;134(1):126-32. Epub 2008 Mar 13. PubMed PMID: 18339775.
503: Kobayashi S, Murayama S, Takanashi S, Takahashi K, Miyatsuka S, Fujita T,
Ichinohe S, Koike Y, Kohagizawa T, Mori H, Deguchi Y, Higuchi K, Wakasugi H, Sato
T, Wada Y, Nagata M, Okabe N, Tatsuzawa O. Clinical features and prognoses of 23
patients with chronic granulomatous disease followed for 21 years by a single
hospital in Japan. Eur J Pediatr. 2008 Dec;167(12):1389-94. Epub 2008 Mar 12.
PubMed PMID: 18335239.
504: Quinkler M, Hahner S, Wortmann S, Johanssen S, Adam P, Ritter C, Strasburger
C, Allolio B, Fassnacht M. Treatment of advanced adrenocortical carcinoma with
erlotinib plus gemcitabine. J Clin Endocrinol Metab. 2008 Jun;93(6):2057-62. Epub
2008 Mar 11. Erratum in: J Clin Endocrinol Metab. 2008 Aug;93(8):3230. Ritte,
Christian [corrected to Ritter, Christian]. PubMed PMID: 18334586.
505: Escobar GJ, Fireman BH, Palen TE, Gardner MN, Lee JY, Clark MP, Kipnis P.
Risk adjusting community-acquired pneumonia hospital outcomes using automated
databases. Am J Manag Care. 2008 Mar;14(3):158-66. PubMed PMID: 18333708.
506: Cocanour CS, Dial ED, Lichtenberger LM, Gonzalez EA, Kozar RA, Moore FA,
Mercer DW. Gastric alkalinization after major trauma. J Trauma. 2008
Mar;64(3):681-7. PubMed PMID: 18332808.
507: Demetriades D, Velmahos GC, Scalea TM, Jurkovich GJ, Karmy-Jones R, Teixeira
PG, Hemmila MR, O'Connor JV, McKenney MO, Moore FO, London J, Singh MJ, Lineen E,
Spaniolas K, Keel M, Sugrue M, Wahl WL, Hill J, Wall MJ, Moore EE, Margulies D,
Malka V, Chan LS; American Association for the Surgery of Trauma Thoracic Aortic
Injury Study Group. Operative repair or endovascular stent graft in blunt
traumatic thoracic aortic injuries: results of an American Association for the
Surgery of Trauma Multicenter Study. J Trauma. 2008 Mar;64(3):561-70; discussion
570-1. PubMed PMID: 18332794.
508: Fujimoto K. Usefulness of contrast-enhanced magnetic resonance imaging for
evaluating solitary pulmonary nodules. Cancer Imaging. 2008 Mar 3;8:36-44.
Review. PubMed PMID: 18331971; PubMed Central PMCID: PMC2267694.
509: Na MJ, Dikensoy O, Light RW. New trends in the diagnosis and treatment in
parapneumonic effusion and empyema. Tuberk Toraks. 2008;56(1):113-20. Review.
PubMed PMID: 18330766.
510: Daher EF, Marques CN, Lima RS, Silva Júnior GB, Barbosa AS, Barbosa ES, Mota
RM, Leite da Silva S, Araújo SM, Libório AB. Acute kidney injury in an infectious
disease intensive care unit - an assessment of prognostic factors. Swiss Med
Wkly. 2008 Mar 8;138(9-10):128-33. PubMed PMID: 18330732.
511: Chalmers JD, Singanayagam A, Hill AT. C-reactive protein is an independent
predictor of severity in community-acquired pneumonia. Am J Med. 2008
Mar;121(3):219-25. PubMed PMID: 18328306.
512: Ishikawa N, Hattori N, Yokoyama A, Tanaka S, Nishino R, Yoshioka K, Ohshimo
S, Fujitaka K, Ohnishi H, Hamada H, Arihiro K, Kohno N. Usefulness of monitoring
the circulating Krebs von den Lungen-6 levels to predict the clinical outcome of
patients with advanced nonsmall cell lung cancer treated with epidermal growth
factor receptor tyrosine kinase inhibitors. Int J Cancer. 2008 Jun
1;122(11):2612-20. PubMed PMID: 18324627.
513: Lazor R. [Cryptogenic and secondary organizing pneumonia]. Rev Prat. 2007
Dec 31;57(20):2243-8. Review. French. PubMed PMID: 18320744.
514: Yeboah-Antwi K, Addo-Yobo E, Adu-Sarkodie Y, Carlin JB, Plange-Rhule G, Osei
Akoto A, Weber MW, Hamer DH. Clinico-epidemiological profile and predictors of
severe illness in young infants (0-59 days) in Ghana. Ann Trop Paediatr. 2008
Mar;28(1):35-43. PubMed PMID: 18318947.
515: Oikawa R, Takahara Y, Yamaya A, Saito M, Kojima K, Tachi Y, Oikawa T,
Nakagawa K, Tsuchihara K, Iguchi M, Tobe T, Takahashi M, Huang J, Osanai K, Toga
H. [Case of broncholithiasis lithoptysis occurring spontaneously after repeated
pneumonia]. Nihon Kokyuki Gakkai Zasshi. 2008 Feb;46(2):126-30. Japanese. PubMed
PMID: 18318256.
516: Winterholler C. [Diagnosis and treatment of dysphagia in patients with
neuromuscular disease]. Pneumologie. 2008 Mar;62 Suppl 1:S35-8. Review. German.
PubMed PMID: 18317982.
517: Parish JM, Blair JE. Coccidioidomycosis. Mayo Clin Proc. 2008
Mar;83(3):343-48; quiz 348-9. Review. PubMed PMID: 18316002.
518: Takatani K, Miyazaki E, Nureki S, Ando M, Ueno T, Okubo T, Takenaka R,
Hiroshige S, Kumamoto T. High-resolution computed tomography patterns and
immunopathogenetic findings in drug-induced pneumonitis. Respir Med. 2008
Jun;102(6):892-8. Epub 2008 Mar 4. PubMed PMID: 18313279.
519: D'Avolio LW, Litwin MS, Rogers SO Jr, Bui AA. Facilitating Clinical Outcomes
Assessment through the automated identification of quality measures for prostate
cancer surgery. J Am Med Inform Assoc. 2008 May-Jun;15(3):341-8. Epub 2008 Feb
28. PubMed PMID: 18308980; PubMed Central PMCID: PMC2410000.
520: Ressner RA, Murray CK, Griffith ME, Rasnake MS, Hospenthal DR, Wolf SE.
Outcomes of bacteremia in burn patients involved in combat operations overseas. J
Am Coll Surg. 2008 Mar;206(3):439-44. Epub 2007 Dec 11. PubMed PMID: 18308213.
521: Graffelman AW, Willemssen FE, Zonderland HM, Neven AK, Kroes AC, van den
Broek PJ. Limited value of chest radiography in predicting aetiology of lower
respiratory tract infection in general practice. Br J Gen Pract. 2008
Feb;58(547):93-7. PubMed PMID: 18307852; PubMed Central PMCID: PMC2233958.
522: Chun JK, Lee TJ, Song JW, Linton JA, Kim DS. Analysis of clinical
presentations of Bruton disease: a review of 20 years of accumulated data from
pediatric patients at Severance Hospital. Yonsei Med J. 2008 Feb 29;49(1):28-36.
PubMed PMID: 18306466; PubMed Central PMCID: PMC2615253.
523: Schuetz P, Stolz D, Mueller B, Morgenthaler NG, Struck J, Mueller C,
Bingisser R, Tamm M, Christ-Crain M. Endothelin-1 precursor peptides correlate
with severity of disease and outcome in patients with community acquired
pneumonia. BMC Infect Dis. 2008 Feb 28;8:22. PubMed PMID: 18304365; PubMed
Central PMCID: PMC2335111.
524: Nseir S, Ader F. Prevalence and outcome of severe chronic obstructive
pulmonary disease exacerbations caused by multidrug-resistant bacteria. Curr Opin
Pulm Med. 2008 Mar;14(2):95-100. Review. PubMed PMID: 18303416.
525: DiDario AG, McGeady SJ, Yousef E. A 15-year-old girl with recurrent
pneumonia. Allergy Asthma Proc. 2008 Jan-Feb;29(1):93-6. PubMed PMID: 18302844.
526: Schuetz P, Koller M, Christ-Crain M, Steyerberg E, Stolz D, Müller C, Bucher
HC, Bingisser R, Tamm M, Müller B. Predicting mortality with pneumonia severity
scores: importance of model recalibration to local settings. Epidemiol Infect.
2008 Dec;136(12):1628-37. Epub 2008 Feb 27. PubMed PMID: 18302806.
527: Frontera JA, Fernandez A, Schmidt JM, Claassen J, Wartenberg KE, Badjatia N,
Parra A, Connolly ES, Mayer SA. Impact of nosocomial infectious complications
after subarachnoid hemorrhage. Neurosurgery. 2008 Jan;62(1):80-7; discussion 87.
PubMed PMID: 18300894.
528: Christ-Crain M, Breidthardt T, Stolz D, Zobrist K, Bingisser R, Miedinger D,
Leuppi J, Tamm M, Mueller B, Mueller C. Use of B-type natriuretic peptide in the
risk stratification of community-acquired pneumonia. J Intern Med. 2008
Aug;264(2):166-76. Epub 2008 Feb 20. PubMed PMID: 18298480.
529: Watanabe A, Takahashi H. Diagnosis and treatment of Q fever: attempts to
clarify current problems in Japan. J Infect Chemother. 2008 Feb;14(1):1-7. Epub
2008 Feb 24. Review. PubMed PMID: 18297442.
530: Yoshida K, Narumi O, Chin M, Inoue K, Tabuchi T, Oda K, Nagayama M, Egawa N,
Hojo M, Goto Y, Watanabe Y, Yamagata S. Characterization of carotid
atherosclerosis and detection of soft plaque with use of black-blood MR imaging.
AJNR Am J Neuroradiol. 2008 May;29(5):868-74. Epub 2008 Feb 22. PubMed PMID:
18296548
531: Chevaliez S, Bouvier-Alias M, Laperche S, Pawlotsky JM. Performance of the
Cobas AmpliPrep/Cobas TaqMan real-time PCR assay for hepatitis B virus DNA
quantification. J Clin Microbiol. 2008 May;46(5):1716-23. Epub 2008 Feb 20.
PubMed PMID: 18287319; PubMed Central PMCID: PMC2395079.
532: Gotoh S, Nishimura N, Takahashi O, Shiratsuka H, Horinouchi H, Ono H,
Uchiyama N, Chohnabayashi N. Adrenal function in patients with community-acquired
pneumonia. Eur Respir J. 2008 Jun;31(6):1268-73. Epub 2008 Feb 20. PubMed PMID:
18287124
533: Tervaert JW. Vasculitis and the intensive care. Acta Clin Belg Suppl.
2007;(2):417-21. Review. PubMed PMID: 18284013.
534: Zadrozna-Sliwka B, Bolanowski M, Jawiarczyk A, Kaluzny M, Syrycka J. The
role of cyclase activating (CAP) and cyclase inhibiting (CIP) parathormone
fractions in the assessment of bone metabolism disturbances in women with
hyperprolactinemia of various origin. Neuro Endocrinol Lett. 2008
Feb;29(1):178-84. PubMed PMID: 18283239.
535: Dvorakova S, Vaclavikova E, Sykorova V, Vcelak J, Novak Z, Duskova J, Ryska
A, Laco J, Cap J, Kodetova D, Kodet R, Krskova L, Vlcek P, Astl J, Vesely D,
Bendlova B. Somatic mutations in the RET proto-oncogene in sporadic medullary
thyroid carcinomas. Mol Cell Endocrinol. 2008 Mar 12;284(1-2):21-7. Epub 2008 Jan
8. PubMed PMID: 18282654.
536: Yavchitz A, Binczak M, Meybeck A, Mounier R, Ricard JD. [An acute
respiratory distress syndrome revealing a chronic eosinophilic pneumonia]. Ann Fr
Anesth Reanim. 2008 Mar;27(3):237-9. Epub 2008 Feb 20. French. PubMed PMID:
18281185
537: Gallo F, Chiono L, Gastaldi E, Venturino E, Giberti C. Prognostic
significance of high-grade prostatic intraepithelial neoplasia (HGPIN): risk of
prostatic cancer on repeat biopsies. Urology. 2008 Sep;72(3):628-32. Epub 2008
Feb 15. PubMed PMID: 18279918.
538: Watanabe A, Yanagihara K, Kohno S, Matsushima T; HAP study group.
Multicenter survey on hospital-acquired pneumonia and the clinical efficacy of
first-line antibiotics in Japan. Intern Med. 2008;47(4):245-54. Epub 2008 Feb 15.
PubMed PMID: 18277024.
539: Galobardes B, McCarron P, Jeffreys M, Davey Smith G. Association between
early life history of respiratory disease and morbidity and mortality in
adulthood. Thorax. 2008 May;63(5):423-9. Epub 2008 Feb 14. PubMed PMID: 18276724.
540: Ebert MD, Sheth S, Fishman EK. Necrotizing pneumonia caused by
community-acquired methicillin-resistant Staphylococcus aureus: an increasing
cause of "mayhem in the lung". Emerg Radiol. 2009 Mar;16(2):159-62. Epub 2008 Feb
15. PubMed PMID: 18274797.
541: Zenteno A D, Girardi B G, Fuentes O L, Pérez H MA, González V R, Abara E S,
Díaz G JP, Kogan A R, Maggiolo M J, Parietti B M, Pavón T D, Rubilar O L.
[Utility of chest x-ray like approach to etiology of community acquired pneumonia
in children]. Rev Chilena Infectol. 2008 Feb;25(1):17-21. Epub 2008 Feb 8.
Spanish. PubMed PMID: 18273518.
542: Conley M, Patino G, Romick B, Almaleh M, Campbell C, Hawkins K, Moore S,
Allan P. Abciximab-induced alveolar hemorrhage after percutaneous coronary
intervention. Can J Cardiol. 2008 Feb;24(2):149-51. PubMed PMID: 18273491; PubMed
Central PMCID: PMC2644574.
543: Yu KT, Wyer PC. Evidence-based emergency medicine/critically appraised
topic. Evidence behind the 4-hour rule for initiation of antibiotic therapy in
community-acquired pneumonia. Ann Emerg Med. 2008 May;51(5):651-62, 662.e1-2.
Epub 2008 Feb 13. Review. PubMed PMID: 18272253.
544: Cui S, Lü SZ, Chen YD, He GX, Meng LJ, Liu JP, Song ZY, Liu XL, Song XT, Ge
CJ, Liu H. Relationship among soluble CD105, hypersensitive C-reactive protein
and coronary plaque morphology: an intravascular ultrasound study. Chin Med J
(Engl). 2008 Jan 20;121(2):128-32. PubMed PMID: 18272038.
545: Apolinario Hidalgo R, Suárez Cabrera M, Geijo Martínez MP, Bernabéu-Wittel
M, Falguera Sacrest M, Limiñana Cañal JM; Grupo de Trabajo de Enfermedades
Infecciosas de la Sociedad Española de Medicina Interna. [Prognostic factors in
community acquired pneumonia. Prospective multicenter study in internal medical
departments]. An Med Interna. 2007 Oct;24(10):467-72. Spanish. PubMed PMID:
18271649
546: de Miguel Diez J, Alvarez-Sala JL. [Prognostic factors in community-acquired
pneumonia]. An Med Interna. 2007 Oct;24(10):465-6. Review. Spanish. PubMed PMID:
18271648
547: Nathani N, Perkins GD, Tunnicliffe W, Murphy N, Manji M, Thickett DR. Kerbs
[truncated: 15,185 more rows]
